# Supplementary material
Source: PubMed Central journal article supplement (PMC4665082)
Supplement: ja5b10072_si_001.pdf [file ja5b10072_si_001.pdf]

**Sidechain conformational distributions of a small protein derived from model-free analysis of a large set of residual dipolar couplings**

Fang Li,<sup>1,2</sup> Alexander Grishaev,<sup>3</sup> Jinfu Ying,<sup>1</sup> and Ad Bax<sup>1,\*</sup>

<sup>1</sup>Laboratory of Chemical Physics, National Institute of Diabetes and Digestive and Kidney Diseases, National Institutes of Health, Bethesda, MD 20892, USA

<sup>2</sup> Key Laboratory of Pesticides and Chemical Biology, College of Chemistry, Central China Normal University, Wuhan, Hubei 430079, People's Republic of China

<sup>3</sup> National Institute of Standards and Technology, Institute for Bioscience and Biotechnology Research, 9600 Gudelsky Dr, Rockville, MD 20850, USA

## SUPPORTING INFORMATION

---

## Text

**Details of the NMR Measurements.** The spectra recorded on the different samples are summarized in SI Table S1, with the compositions of the various samples summarized in SI Table S2. Liquid crystalline solutions were prepared as follows: (A) Pfl samples were obtained by mixing stock solutions of 50 mg/mL Pfl (<http://www.asla-biotech.com>) with protein solutions, followed by mild vortexing. All Pfl-related NMR data were collected at 293 K. (B) Bicelle samples were prepared by mixing 1,2-dihexanoyl-sn-glycero-3-phosphocholine (DHPC) with 1,2-dimyristoyl-sn-glycero-3-phosphocholine (DMPC) and cetyl trimethylammonium bromide (CTAB) at a molar ratio [DHPC]:[DMPC]:[CTAB] of 1:3:0.05. The final NMR sample bicelle concentration was 4.5% w/v. All bicelle-related NMR data were acquired at 308 K. (C) PEG samples were prepared by mixing penta-ethylene glycol monododecyl ether (C12E5; Sigma Aldrich), with hexanol at a molar ratio [PEG]:[hexanol] of 3:2.<sup>1</sup> The final PEG concentration in the NMR sample was 5.5% w/v. All PEG-related NMR data were acquired at 301 K. The absence of significant chemical shift changes over the 293-308 K temperature range was used as evidence for the absence of any significant structural change.

Uniformly  $\{^{13}\text{C}, ^{15}\text{N}\}$ -enriched NMR samples in 95%  $\text{H}_2\text{O}$ , 5%  $\text{D}_2\text{O}$ , 20 mM sodium phosphate buffer, 50 mM NaCl, pH 6.5, and 0.05% sodium azide, were used to record the following spectra:  $^{15}\text{N}$ - $^1\text{H}$  ARTSY for measurement of  $^1D_{\text{NH}}$ ,<sup>2</sup> HA[HN,HB](CACO)NH for  $^3J_{\text{H}\alpha\text{-H}\beta}$ ,<sup>3</sup> CT-HN(COCA)CB for the sum of  $^1D_{\text{C}\beta\text{H}\beta 2}$  and  $^1D_{\text{C}\beta\text{H}\beta 3}$ . The CT-HN(COCA)CB pulse scheme used is analogous to the scheme of Yamazaki et al.<sup>4</sup> but adapted to have  $^1\text{H}^\beta$ -coupled  $^{13}\text{C}^\beta$  evolution (SI Figure S1). The  $^{15}\text{N}$ - $^1\text{H}$  ARTSY spectra were recorded at 600 MHz, using time domain matrices consisting of  $150^* \times 1024^*$  complex data points, or acquisition times of 78 ms ( $t_1$ ,  $^{15}\text{N}$ ) and 121 ms ( $t_2$ ,  $^1\text{H}$ ), using 8 scans per free induction decay (FID), and a 2-s interscan delay (total measurement time ca 1.5 h).

HA[HN,HB](CACO)NH spectra were recorded at 600 MHz, with the  $^{13}\text{C}$  and  $^{15}\text{N}$  carriers at 46 and 118 ppm, respectively. The time domain matrices consisted of  $200^* \times 20^* \times 1024^*$  complex data points, or acquisition times of 36 ms ( $t_1$ ,  $^1\text{H}$ ), 10 ms ( $t_2$ ,  $^{15}\text{N}$ ) and 85 ms ( $t_3$ ,  $^1\text{H}$ ), using 8 scans per FID, and a 1.5 s interscan delay (total measurement time ca 64 h). The CT-HN(COCA)CB spectra were also recorded at 600 MHz, with the  $^{13}\text{C}$  and  $^{15}\text{N}$  carriers set at 43 and 122 ppm, respectively. The time domain matrices consisted of  $267^* \times 22^* \times 1024^*$  complex data points, or acquisition times of 27 ms ( $t_1$ ,  $^{13}\text{C}$ ), 11 ms ( $t_2$ ,  $^{15}\text{N}$ ) and 136 ms ( $t_3$ ,  $^1\text{H}$ ), using 4 scans per FID and a 1.5 s interscan delay (total measurement time ca 48 h).

Uniformly  $\{^{13}\text{C}, ^{15}\text{N}\}$ -labeled NMR samples in 99.8%  $\text{D}_2\text{O}$ , 50 mM sodium phosphate buffer, 50 mM sodium chloride, pH 6.5 (uncorrected meter reading), and 0.05% sodium azide, were used to record the following spectra:  $^1\text{H}$ - $^{13}\text{C}$  CT-HSQC for measurement of  $^1D_{\text{C}\alpha\text{H}\alpha}$ ;  $^1\text{H}$ - $^{13}\text{C}$  CT-HSQC lacking  $^{13}\text{C}'$  and aromatic  $^{13}\text{C}'$  decoupling for measurement of  $^1D_{\text{C}\beta\text{C}\gamma}$  in Phe, Tyr, Asp and Asn; non-CT  $^1\text{H}$ - $^{13}\text{C}$  HSQC spectra for methyl group  $^1D_{\text{C}\beta\text{C}\gamma}$  in Val, Ile, and Thr; and  $^1\text{H}$ - $^{13}\text{C}$  HSQC for measurement of  $^1D_{\text{C}\alpha\text{C}\beta}$ .  $^1\text{H}$ - $^{13}\text{C}$  HSQC spectra were recorded at 900 MHz. For measurement of  $^1D_{\text{C}\alpha\text{C}\beta}$ , the  $^{13}\text{C}$  and  $^{15}\text{N}$  carriers were set at 56 and 118 ppm, respectively and the time domain matrices consisted of  $1024^* \times 1024^*$  complex data points, or acquisition times of 106 ms ( $t_1$ ,  $^{13}\text{C}$ ) and 103 ms ( $t_2$ ,  $^1\text{H}$ ), using 4 scans per FID, and a 1.5 s interscan delay (ca 2 h measurement time per spectrum). For the  $^1\text{H}$ - $^{13}\text{C}$  CT-HSQC measurement of  $^1D_{\text{C}\alpha\text{H}\alpha}$ , the  $^{13}\text{C}$  and  $^{15}\text{N}$  carriers were set at 49 and 118 ppm, respectively and the time domain matrices consisted of  $1108^* \times 1024^*$

---

complex data points, or acquisition times of 55.4 ms ( $t_1$ ,  $^{13}\text{C}$ ) and 103 ms ( $t_2$ ,  $^1\text{H}$ ), using 8 scans per FID, and a 1.5 s interscan delay (*ca* 8 h total measurement time). For measurement of  $^1D_{\text{C}\beta\text{C}\gamma}$  in Phe, Tyr, Asp and Asn, the  $^{13}\text{C}$  and  $^{15}\text{N}$  carriers were set at 40 and 118 ppm, respectively. The time domain matrix consisted of  $1101^* \times 1024^*$  complex data points, or acquisition times of 55 ms ( $t_1$ ,  $^{13}\text{C}$ ) and 103 ms ( $t_2$ ,  $^1\text{H}$ ), and using 4 scans per FID (*ca* 4 h total measurement time). For non-CT  $^1\text{H}$ - $^{13}\text{C}$  HSQC spectra, the  $^{13}\text{C}$  and  $^{15}\text{N}$  carriers were set at 20 and 118 ppm, respectively. The time domain matrices consisted of  $650^* \times 1024^*$  complex data points, or acquisition times of 84.5 ms ( $t_1$ ,  $^{13}\text{C}$ ) and 206 ms ( $t_2$ ,  $^1\text{H}$ ), using 4 scans per FID, and a 1.5 s interscan delay (*ca* 2.5 h total measurement time).

Uniformly  $\{^{13}\text{C}, ^{15}\text{N}\}$ -enriched, fractionally (75%) deuterated NMR samples were in 99.8%  $\text{D}_2\text{O}$ , 50 mM sodium phosphate buffer, 50 mM NaCl, pD 6.5, 0.05% sodium azide, and were used to record DEPT-filtered  $^1\text{H}$ - $^{13}\text{C}$  CT-HSQC (SI Figure S2) spectra for measurement of individual  $^1D_{\text{C}\beta\text{H}\beta 2}$  and  $^1D_{\text{C}\beta\text{H}\beta 3}$  values, as well as  $^1D_{\text{C}\alpha\text{H}\alpha}$  to calibrate alignment strength. The DEPT-filtered  $^1\text{H}$ - $^{13}\text{C}$  CT-HSQC spectra were recorded at 900 MHz, with the  $^{13}\text{C}$  and  $^{15}\text{N}$  carriers set at 49 and 118 ppm, respectively. The time domain matrices consisted of  $824^* \times 1024^*$  complex data points, or acquisition times of 48 ms ( $t_1$ ,  $^{13}\text{C}$ ) and 103 ms ( $t_2$ ,  $^1\text{H}$ ), using 8 scans per free induction decay (FID), and a 1.5 s interscan delay (*ca* 6 h total measurement time).

Uniformly  $\{^2\text{H}, ^{13}\text{C}, ^{15}\text{N}\}$ -enriched NMR samples were in 95%  $\text{H}_2\text{O}$ , 5%  $\text{D}_2\text{O}$ , 50 mM sodium phosphate buffer, 50 mM NaCl, pH 6.5, 0.05% sodium azide, and were used to record  $^1\text{H}$ - $^{15}\text{N}$ -HSQC ( $^{15}\text{N}$ - $^1\text{H}$  ARTSY) spectra for  $^1D_{\text{NH}}$  (for alignment strength calibration) and 3D HN(CO)CA spectra with a long  $^{13}\text{C}^\alpha$  acquisition time (106 ms) for measurement of  $^1D_{\text{C}\alpha\text{C}\beta}$ , both at 600 MHz. The 3D HN(CO)CA time domain matrices consisted of  $40^* \times 225^* \times 1024^*$  complex data points, or acquisition times of 28 ms ( $t_1$ ,  $^{15}\text{N}$ ), 106 ms ( $t_2$ ,  $^{13}\text{C}$ ) and 136 ms ( $t_3$ ,  $^1\text{H}$ ), using 4 scans per free induction decay (FID), and a 1.5 s interscan delay (*ca* 72 h total measurement time).

---

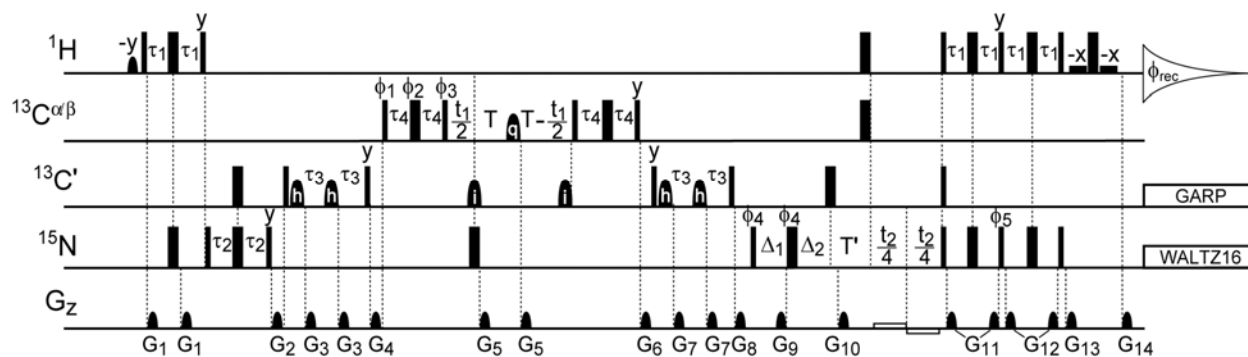

**Figure S1.** Pulse scheme of the CT-HN(COCA)CB experiment. The carriers of  $^{13}\text{C}^{\alpha\beta}$ ,  $^{13}\text{C}'$  and  $^{15}\text{N}$  are at 43, 176 and 122 ppm. Pulse durations should scale inversely with the magnetic field strength, and at 150.90 MHz  $^{13}\text{C}$  (600.1 MHz  $^1\text{H}$ ) frequency the following settings were used: Rectangular low-power and SINC-shaped  $^1\text{H}$  pulses are applied using  $\gamma_{\text{H}}B_1 = 208$  and 278 Hz (at its midpoint), respectively. The RF strength of  $^{13}\text{C}$   $90^\circ/180^\circ$  rectangular pulses is 5.2/11.7 kHz. The  $^{13}\text{C}'$  selective Hyperbolic-Secant <sup>5</sup> and IBURP2 <sup>6</sup> pulses are marked with h and i, respectively, and have a duration of 600 and 400  $\mu\text{s}$  (centered at 116 and 160 ppm); The  $^{13}\text{C}^{\alpha\beta}$  selective Q3 pulses are marked with q, and have a duration of 220  $\mu\text{s}$ .  $^{13}\text{C}$  GARP /  $^{15}\text{N}$  WALTZ16 decoupling <sup>7</sup> during  $^1\text{H}$  acquisition is applied at an RF field strength of 1.8/1.2 kHz. Unless specified, all pulse phases are x. Phase cycling:  $\phi_1 = y, -y$ ;  $\phi_2 = x, -x$ ;  $\phi_3 = x, -x$ ;  $\phi_4 = y, y, -y, -y$ ;  $\phi_5 = y$ ; and  $\phi_{\text{rec}} = x, -x, -x, x$ . Delay durations:  $\tau_1 = 1/(4J_{\text{HN}}) \approx 2.7$  ms;  $\tau_2 = 1/(4J_{\text{NC}'}) \approx 12.5$  ms;  $\tau_3 \approx 4$  ms;  $\tau_4 = 1/(4J_{\text{C}\alpha\beta}) \approx 7.2$  ms;  $T = 14.1$  ms;  $T' = 12.5$  ms;  $\Delta_1 = \max(0, T' - 0.5 \times t_2)$ ;  $\Delta_2 = \max(0, 0.5 \times t_2 - T')$ . Gradient pulses  $G_{1, \dots, 14}$  (z-axis) have durations of 1800, 500, 2000, 500, 137, 1000, 2400, 500, 500, 500, 250, 800, 200 and 301  $\mu\text{s}$ , and strengths of 3.5, 25.9, 4.2, 27.3, 28.7, 34.3, 4.9, 31.5, 37.8, -44.8, 21.0, 37.1, 41.3, and 41.3 G/cm. The weak (0.77 G/cm) bipolar gradient applied during the second half of the  $t_2$  evolution period serves to prevent radiation damping of the inverted  $\text{H}_2\text{O}$  signal. Quadrature detection in the  $t_1$  dimension is achieved by increasing  $\phi_1$ ,  $\phi_2$ ,  $\phi_3$  in the regular States-TPPI manner; quadrature in the  $t_2$  dimension is obtained by the Rance-Kay method, inverting  $G_9/G_{10}$  and  $\phi_5$ .

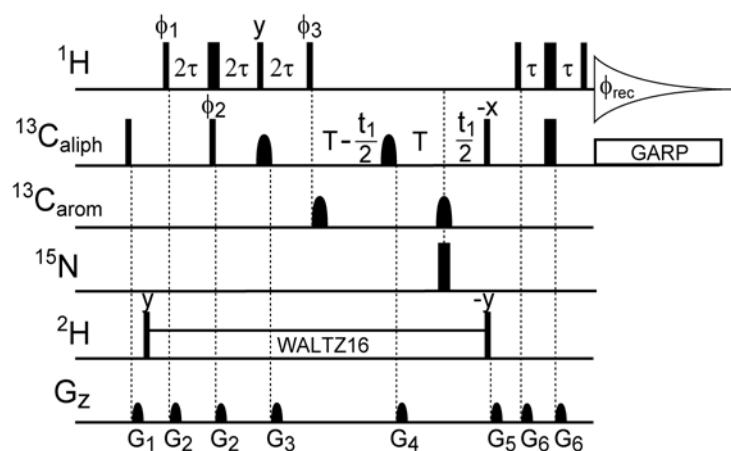

**Figure S2.** Pulse scheme of the DEPT-filtered  $^1\text{H}$ - $^{13}\text{C}$  CT-HSQC experiment. The carrier of  $^{13}\text{C}_{\text{aliph}}$  is at 49 ppm. Narrow and wide bars indicate non-selective  $90^\circ$  and  $180^\circ$  pulses, respectively. Pulse durations should scale inversely with the magnetic field strength, and at 226.37 MHz  $^{13}\text{C}$  frequency the following values were used: The  $^{13}\text{C}_{\text{aliph}}$  and  $^{13}\text{C}_{\text{arom}}$  shaped pulses are Hyperbolic-Secant and IBURP2, with durations of 550 and 300  $\mu\text{s}$  (centered at 20 and 151 ppm), respectively.  $^{13}\text{C}$  GARP decoupling during acquisition is applied at an RF field strength of 3.8 kHz.  $^2\text{H}$  decoupling is applied using the WALTZ-16 scheme with an RF field strength of 833 Hz. Unless specified, all pulse phases are  $x$ . Phase cycling:  $\phi_1 = x, x, -x, -x$ ;  $\phi_2 = x, x, x, x, -x, -x, -x, -x$ ;  $\phi_3 = x, -x$ ; and  $\phi_{\text{rec}} = x, x, -x, -x, -x, -x, x, x$ . Delay durations:  $\tau = 1/(4J_{\text{CH}}) \approx 1.8$  ms;  $T = 24.2$  ms. Gradient pulses  $G_{1,\dots,6}$  (z-axis) have durations of 1.5, 1.0, 1.0, 1.0, 0.6 and 1.0 ms, and strengths of 23.8, 28.7, 40.6, 11.9, -33.6, and 21.7 G/cm. Quadrature detection in the  $t_1$  dimension is achieved by increasing  $\phi_2$  in the regular States-TPPI manner.

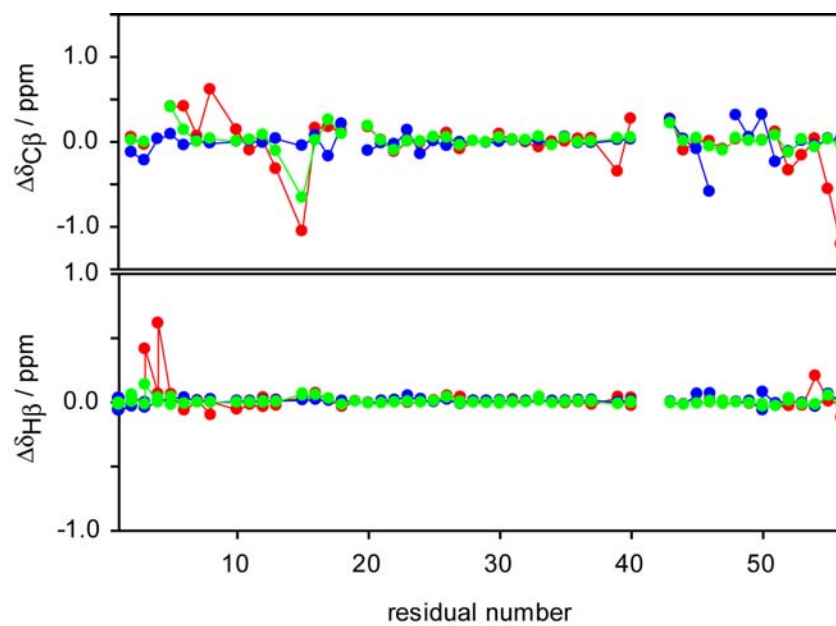

**Figure S3.**  $^{13}\text{C}_\beta$  and  $^1\text{H}_\beta$  chemical shift difference from Table S3 and S4.  $\Delta\delta$  is the chemical shift difference between wild-type GB3 and mutant. Red, blue and green represent mutants K4A/K19E/V42E-CHis<sub>6</sub>, K19A/V42E/D47K and K4A/K19E/V42E respectively.

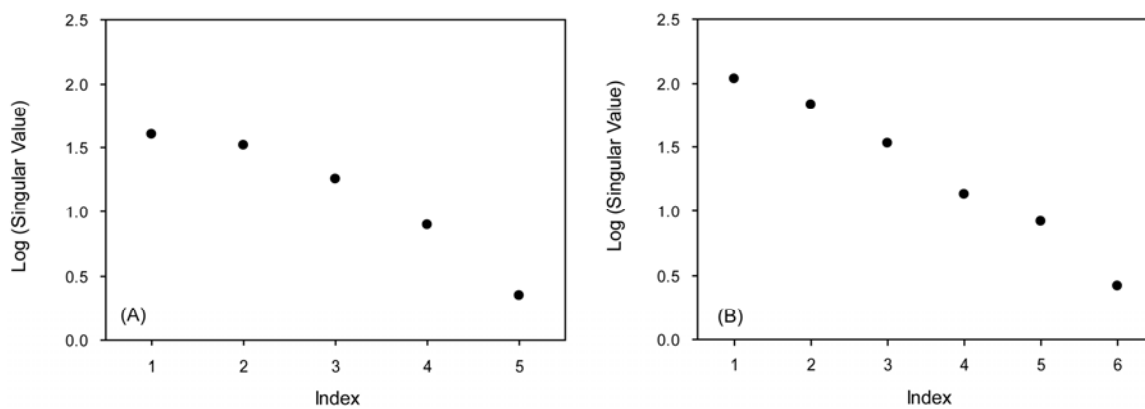

**Figure S4.** Singular value decomposition of (A) alignment tensors, (B)  $^1D_{\text{NH}}$  RDCs for six different alignment conditions (three different media, plus three mutants).

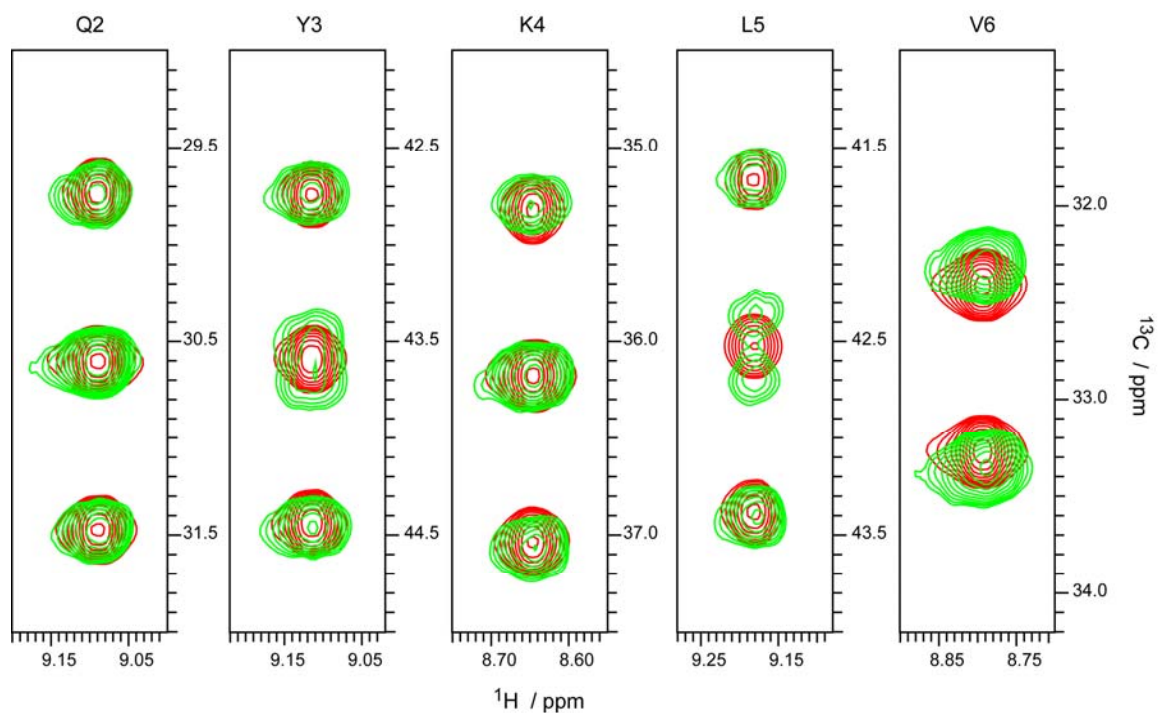

**Figure S5.** Strips from the 3D CT-HN(COCA)CB spectrum, used for deriving the sum of  $^1D_{\text{C}\beta\text{H}\beta 2}$  and  $^1D_{\text{C}\beta\text{H}\beta 3}$ . Red contours represent the isotropic wild-type GB3 spectrum; green contours are strips from the same GB3 sample aligned with 4.5% bicelles. The multiplets shown correspond to the  $^1\text{H}$ -coupled  $^{13}\text{C}\beta$  resonances of residues Q2, Y3, K4, L5, and V6.



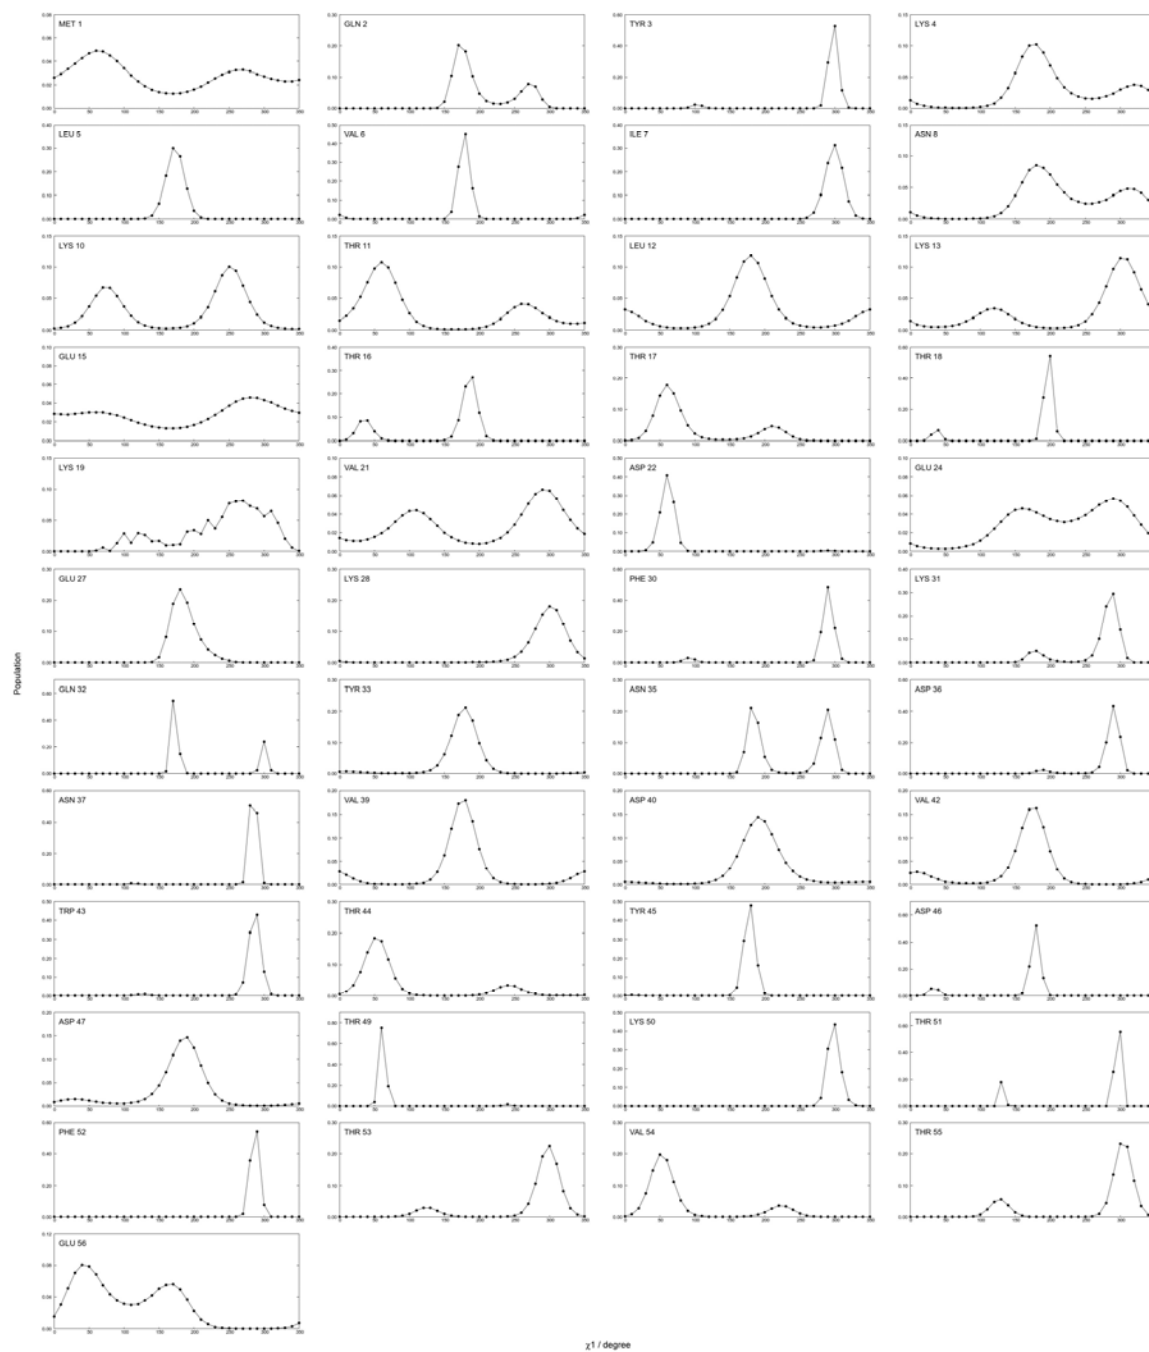

**Figure S6.** Distributions of  $\chi_1$  torsion angles for all residues in GB3, derived from RDC data. (see also Figure 4, main text)

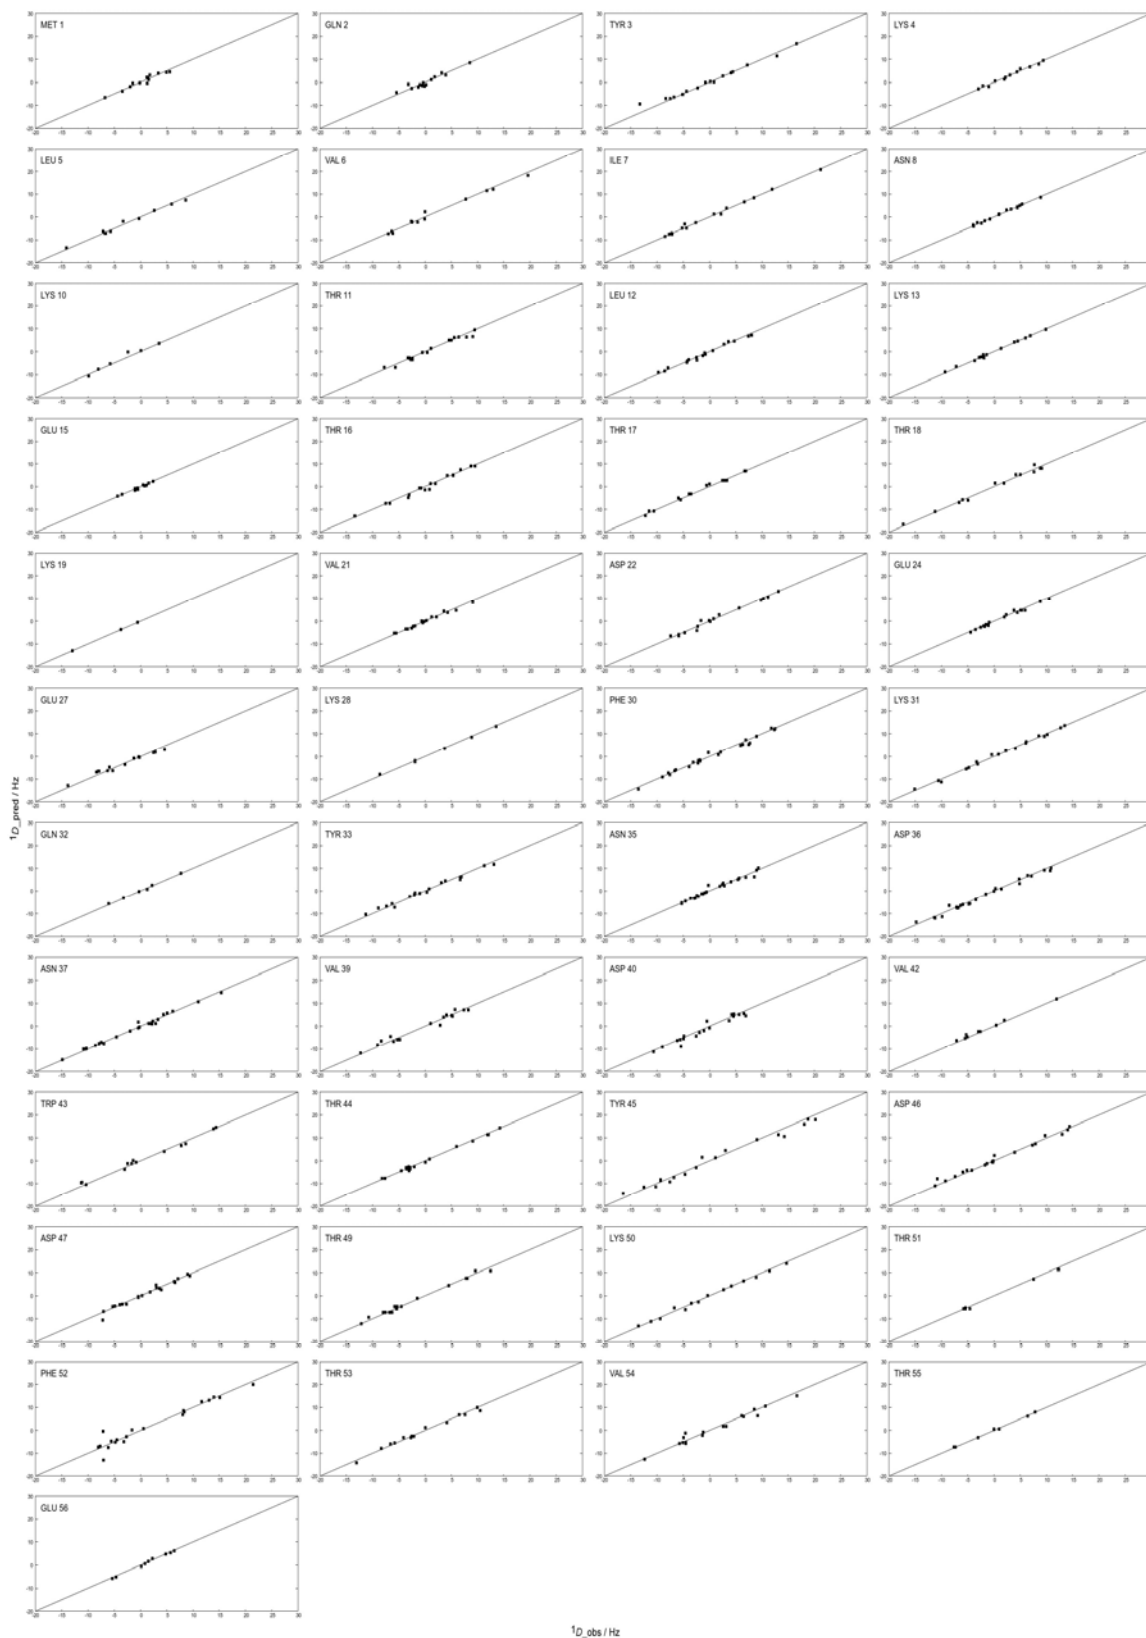

**Figure S7:** The correlations between observed and predicted RDCs from the result of the  $\chi_1$  ensemble VW-Fit program in Figure S6.

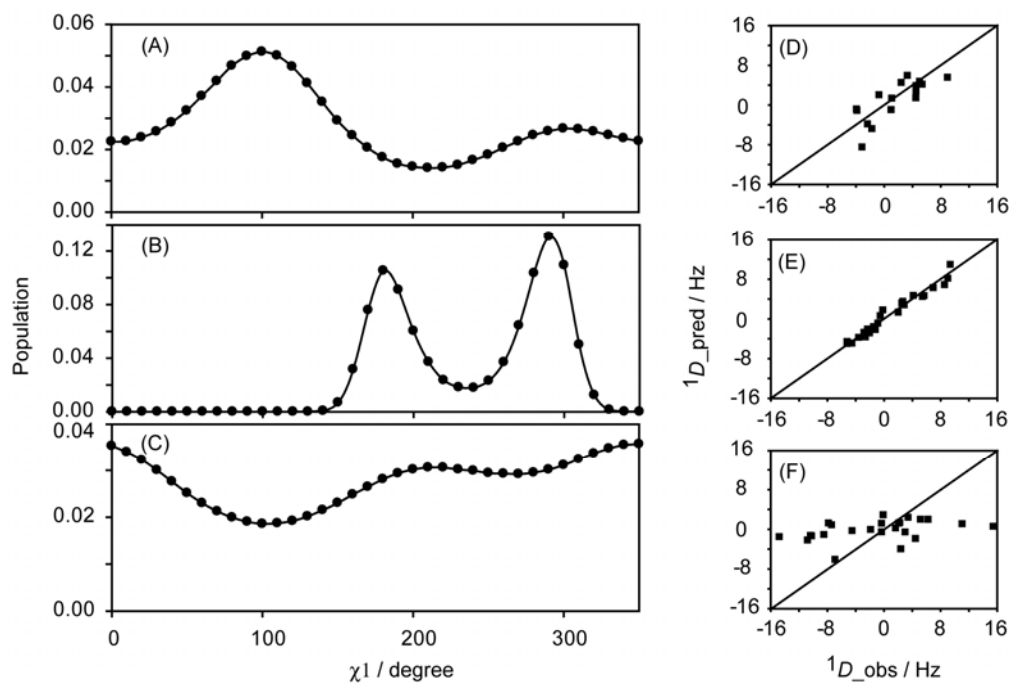

**Figure S8.** Distributions of  $\chi_1$  torsion angles for the three Asn residues, (A) Asn8, (B) Asn35, (C) Asn37, in GB3 with reversed  $H^{\beta 2}$  and  $H^{\beta 3}$  stereospecific assignments. The correlations between observed and predicted RDCs for these residues are shown in panels (D) Asn8, (E) Asn35, (F) Asn37. The results of correct stereospecific assignments are shown in Figure 4, main text.

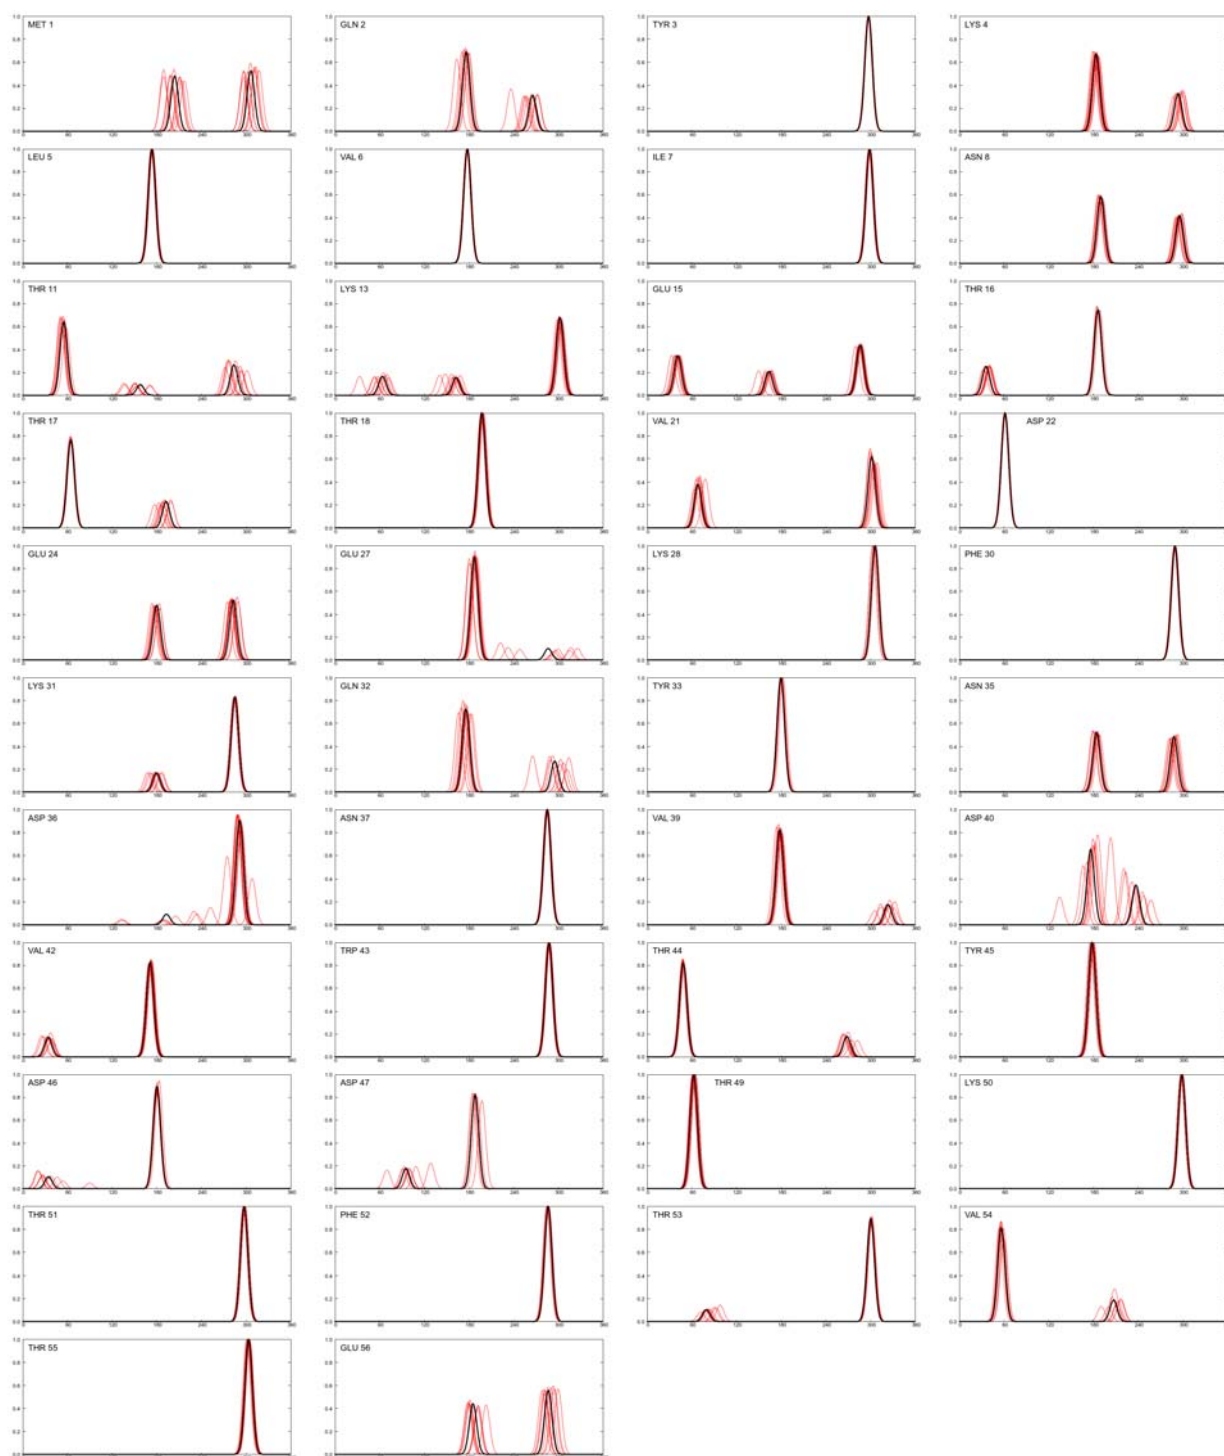

**Figure S9.** Effect of uncertainty in the structure and sidechain RDC data on  $\chi_1$  distributions obtained by Monte Carlo rotamer analysis for all residues.

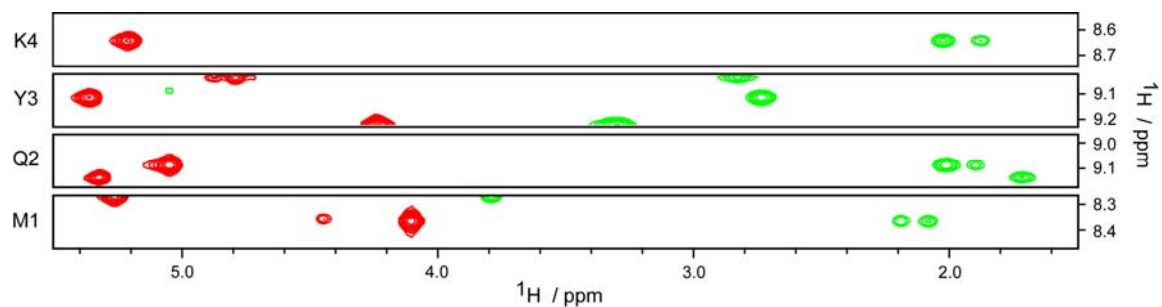

**Figure S10.** Aliphatic region from strips taken from the 3D HA[HN,HB](CACO)NH spectrum, used for measuring  ${}^3J_{H\alpha H\beta}$ .<sup>3</sup> The  $H^\alpha$  diagonal peaks are in red;  $H^\alpha$ - $H^\beta$  cross peaks have opposite signs and are shown in green.

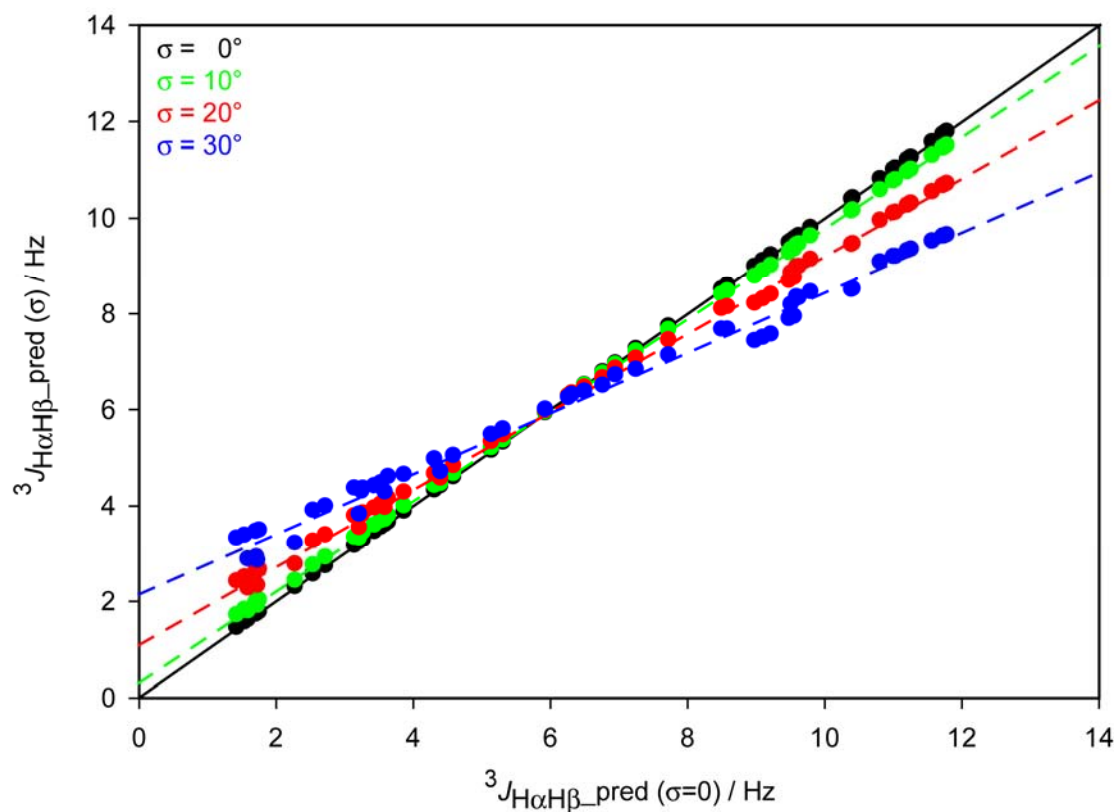

**Figure S11.** Correlations between predicted  ${}^3J_{H\alpha H\beta}(\sigma=0)$  and  ${}^3J_{H\alpha H\beta}(\sigma)$  couplings.  ${}^3J_{H\alpha H\beta}$  are generated by the substituent-specific Karplus equations of Haasnoot et al. for the residue types and  $\chi_1$  angles reported in main text Table 1, using the Karplus equations of Table S9. For each rotamer, the motion-modified (cf eq 4)  ${}^3J_{H\alpha H\beta}$  is predicted prior to calculating the displayed, weighted sum.  $\sigma$  is the standard deviation to the  $\chi_1$  angles.

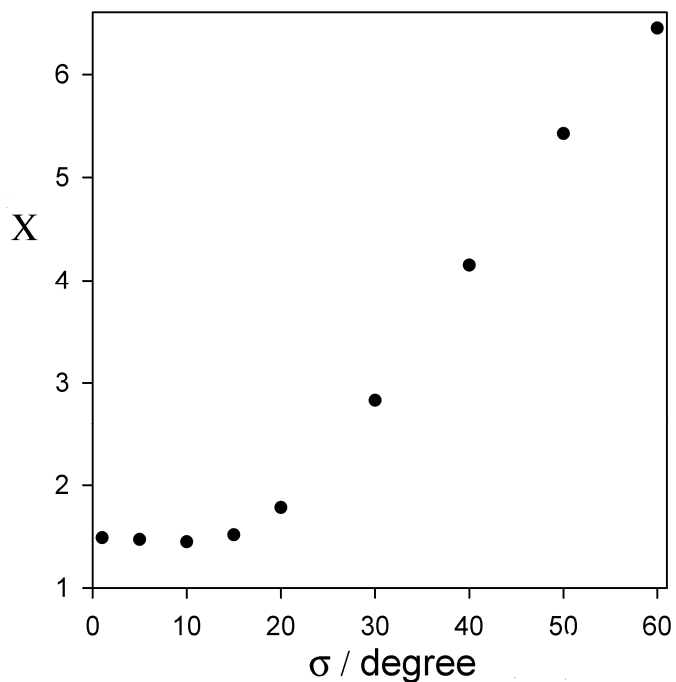

**Figure S12.** Value for the normalized Chi ( $X$ ) value as a function of the standard deviation,  $\sigma$ , of the Gaussian rotamer distribution obtained for the best fit between the observed and predicted RDC values when using the discrete-rotamer model, with the model selection parameters of Table 1, as a function of the width of the Gaussian distribution used for each rotamer. For fits involving multiple rotamers, the same Gaussian width was assumed for each fitted rotamer. The reported average  $X$  value represents the average over all residues reported in Table 1, main text.

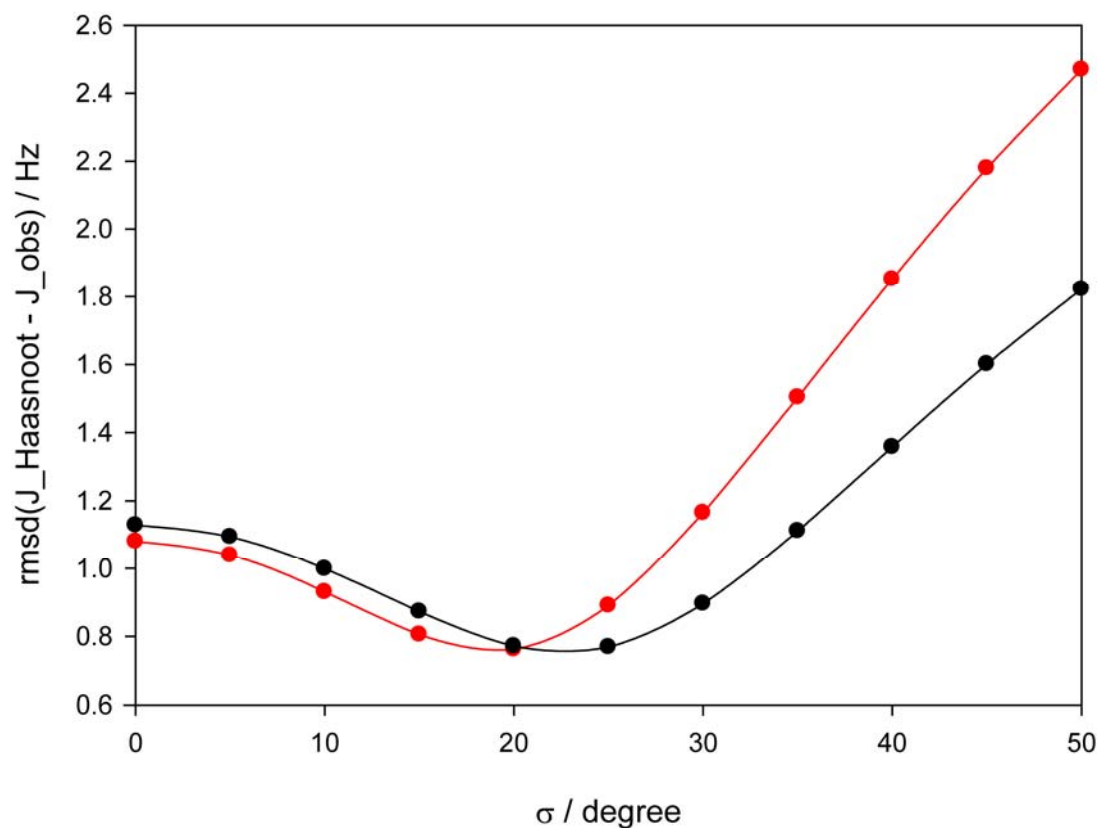

**Figure S13.** Root-mean-square difference between the sigma-corrected Haasnot-Karplus  $^3J_{H\alpha H\beta}$  predictions and observed values, as a function of the amplitude of the Gaussian fluctuations. (black) All residues for which  $^3J_{H\alpha H\beta}$  values were available are included in the rmsd calculation, regardless of the number of rotamers observed and listed in Table 1, main text. (red) Only residues for which a single rotamer was selected in Table 1 were used for the rmsd calculation.

**Table S1. Summary of NMR spectra recorded for each of the different samples**

| Sample                                                                             | Spectra                                                                                                    | RDC type                                                                                              | <sup>1</sup> H frequency / MHz |
|------------------------------------------------------------------------------------|------------------------------------------------------------------------------------------------------------|-------------------------------------------------------------------------------------------------------|--------------------------------|
| Sample I: { <sup>13</sup> C, <sup>15</sup> N} in H <sub>2</sub> O <sup>a</sup>     | ARTSY                                                                                                      | <sup>1</sup> D <sub>NH</sub>                                                                          | 600                            |
|                                                                                    | CT-HN(COCA)CB                                                                                              | <sup>1</sup> D <sub>CBHβ2</sub> + <sup>1</sup> D <sub>CBHβ3</sub>                                     |                                |
| Sample II: { <sup>13</sup> C, <sup>15</sup> N} in D <sub>2</sub> O                 | <sup>1</sup> H- <sup>13</sup> C HSQC                                                                       | <sup>1</sup> D <sub>CαCβ</sub>                                                                        | 900                            |
|                                                                                    | <sup>1</sup> H- <sup>13</sup> C CT-HSQC                                                                    | <sup>1</sup> D <sub>CαHα</sub>                                                                        |                                |
|                                                                                    | <sup>1</sup> H- <sup>13</sup> C CT-HSQC (aromatic)<br>non-CT <sup>1</sup> H- <sup>13</sup> C HSQC (methyl) | <sup>1</sup> D <sub>CβCγ</sub>                                                                        |                                |
| Sample III: 75% deuterated { <sup>13</sup> C, <sup>15</sup> N} in D <sub>2</sub> O | DEPT-filtered <sup>1</sup> H- <sup>13</sup> C CT-HSQC                                                      | <sup>1</sup> D <sub>CαHα</sub> ,<br><sup>1</sup> D <sub>CBHβ2</sub> , <sup>1</sup> D <sub>CBHβ3</sub> | 900                            |
| Sample IV: { <sup>2</sup> H, <sup>13</sup> C, <sup>15</sup> N} in H <sub>2</sub> O | ARTSY                                                                                                      | <sup>1</sup> D <sub>NH</sub>                                                                          | 600                            |
|                                                                                    | HN(CO)CA                                                                                                   | <sup>1</sup> D <sub>CαCB</sub>                                                                        |                                |

<sup>a</sup> Sample I: uniformly {<sup>13</sup>C, <sup>15</sup>N}-enriched NMR samples in 95% H<sub>2</sub>O, 5% D<sub>2</sub>O, 20 mM sodium phosphate buffer, 50 mM NaCl, pH 6.5, and 0.05% sodium azide; Sample II: uniformly {<sup>13</sup>C, <sup>15</sup>N}-enriched NMR samples in 99.8% D<sub>2</sub>O, 50 mM sodium phosphate buffer, 50 mM sodium chloride, pD 6.5 (uncorrected meter reading), and 0.05% sodium azide; Sample III: uniformly {<sup>13</sup>C, <sup>15</sup>N}-enriched, fractionally (75%) deuterated NMR samples were in 99.8% D<sub>2</sub>O, 50 mM sodium phosphate buffer, 50 mM NaCl, pD 6.5, and 0.05% sodium azide; Sample IV: uniformly {<sup>2</sup>H, <sup>13</sup>C, <sup>15</sup>N}-enriched NMR samples were in 95% H<sub>2</sub>O, 5% D<sub>2</sub>O, 50 mM sodium phosphate buffer, 50 mM NaCl, pH 6.5, and 0.05% sodium azide.



**Table S2. Compositions of samples used for NMR experiments**

| Sample                                      |                        | Sample I: $\{^{13}\text{C}, ^{15}\text{N}\}$ in $\text{H}_2\text{O}$ <sup>a</sup> |                     | Sample II: $\{^{13}\text{C}, ^{15}\text{N}\}$ in $\text{D}_2\text{O}$ |                      | Sample III: 75% deuterated $\{^{13}\text{C}, ^{15}\text{N}\}$ in $\text{D}_2\text{O}$ |                      | Sample IV: $\{^2\text{H}, ^{13}\text{C}, ^{15}\text{N}\}$ in $\text{H}_2\text{O}$ |                      |
|---------------------------------------------|------------------------|-----------------------------------------------------------------------------------|---------------------|-----------------------------------------------------------------------|----------------------|---------------------------------------------------------------------------------------|----------------------|-----------------------------------------------------------------------------------|----------------------|
|                                             |                        | $C_p / \text{mM}$ <sup>b</sup>                                                    | LX concentr.(mg/mL) | $C_p / \text{mM}$                                                     | LX concentr. (mg/mL) | $C_p / \text{mM}$                                                                     | LX concentr. (mg/mL) | $C_p / \text{mM}$                                                                 | LX concentr. (mg/mL) |
| Wild-type GB3                               | isotropic <sup>c</sup> | 2.5                                                                               |                     | 1.7                                                                   |                      | 3.2                                                                                   |                      | 0.5                                                                               |                      |
|                                             | Bicelle                | 0.5                                                                               | 45                  | 0.7                                                                   | 45                   | 1.5                                                                                   | 45                   | 0.5                                                                               | 45                   |
|                                             | PEG                    | 0.5                                                                               | 55                  | 1.4                                                                   | 55                   | 0.7                                                                                   | 55                   | 0.5                                                                               | 55                   |
|                                             | Pfl                    | 1.2                                                                               | 7                   | 1.6                                                                   | 5                    | 1.3                                                                                   | 7                    | 0.5                                                                               | 9                    |
| Mutant 1 (K4A/K19E/V42E-CHis <sub>6</sub> ) | isotropic              | 0.9                                                                               |                     | 0.9                                                                   |                      | 1.1                                                                                   |                      |                                                                                   |                      |
|                                             | Pfl                    | 0.7                                                                               | 12                  | 0.6                                                                   | 8                    | 0.9                                                                                   | 6                    |                                                                                   |                      |
| Mutant 2 (K19A/V42E/D47K)                   | isotropic              | 1.3                                                                               |                     | 0.9                                                                   |                      | 2.2                                                                                   |                      |                                                                                   |                      |
|                                             | Pfl                    | 1.1                                                                               | 10                  | 0.5                                                                   | 7                    | 1.2                                                                                   | 7                    |                                                                                   |                      |
| Mutant 3 (K4A/K19E/V42E)                    | isotropic              | 2.0                                                                               |                     | 1.2                                                                   |                      | 1.2                                                                                   |                      |                                                                                   |                      |
|                                             | Pfl                    | 1.0                                                                               | 33                  | 1.0                                                                   | 21                   | 0.4                                                                                   | 20                   |                                                                                   |                      |

<sup>a</sup> Samples are the same as the ones in Table S1.

<sup>b</sup> Protein concentration.

<sup>c</sup> All isotropic and Pfl spectra were recorded at 293K; bicelle and PEG spectra were obtained at 308 and 301 K, respectively.

**Table S3.  $^{13}\text{C}^{\beta}$  Chemical shift for GB3 and three mutants**

| Res# | AA type | $\delta_{\text{C}^{\beta}} / \text{ppm}^a$ |                       |          |          | $\Delta\delta_{\text{C}^{\beta}} / \text{ppm}^b$ |          |          |
|------|---------|--------------------------------------------|-----------------------|----------|----------|--------------------------------------------------|----------|----------|
|      |         | GB3                                        | Mutant 1 <sup>c</sup> | Mutant 2 | Mutant 3 | Mutant 1                                         | Mutant 2 | Mutant 3 |
| 1    | MET     |                                            | 32.88                 | 32.84    | 32.94    |                                                  |          |          |
| 2    | GLN     | 30.60                                      | 30.65                 | 30.48    | 30.62    | 0.05                                             | -0.13    | 0.01     |
| 3    | TYR     | 43.59                                      | 43.55                 | 43.37    | 43.58    | -0.04                                            | -0.22    | -0.01    |
| 4    | LYS     | 36.18                                      | 22.85                 | 36.21    | 22.82    | - <sup>d</sup>                                   | 0.03     | -        |
| 5    | LEU     | 42.52                                      | 42.93                 | 42.61    | 42.93    | 0.41                                             | 0.09     | 0.41     |
| 6    | VAL     | 32.84                                      | 33.25                 | 32.80    | 32.98    | 0.41                                             | -0.04    | 0.14     |
| 7    | ILE     | 39.25                                      | 39.31                 | 39.25    | 39.24    | 0.06                                             | 0.01     | 0.00     |
| 8    | ASN     | 37.79                                      | 38.40                 | 37.77    | 37.82    | 0.61                                             | -0.02    | 0.03     |
| 10   | LYS     | 32.62                                      | 32.76                 | 32.62    | 32.63    | 0.14                                             | 0.00     | 0.00     |
| 11   | THR     | 69.87                                      | 69.76                 | 69.87    | 69.89    | -0.11                                            | 0.01     | 0.02     |
| 12   | LEU     | 43.37                                      | 43.38                 | 43.36    | 43.45    | 0.01                                             | -0.01    | 0.08     |
| 13   | LYS     | 34.74                                      | 34.42                 | 34.78    | 34.63    | -0.32                                            | 0.03     | -0.11    |
| 15   | GLU     | 34.00                                      | 32.94                 | 33.95    | 33.34    | -1.06                                            | -0.05    | -0.66    |
| 16   | THR     | 69.52                                      | 69.68                 | 69.59    | 69.54    | 0.16                                             | 0.07     | 0.01     |
| 17   | THR     | 73.33                                      | 73.50                 | 73.15    | 73.58    | 0.17                                             | -0.17    | 0.26     |
| 18   | THR     | 69.99                                      | 70.10                 | 70.20    | 70.08    | 0.11                                             | 0.21     | 0.09     |
| 19   | LYS     | 33.69                                      | 30.53                 | 19.91    | 30.55    | -                                                | -        | -        |
| 20   | ALA     | 23.79                                      | 23.96                 | 23.68    | 23.97    | 0.17                                             | -0.11    | 0.18     |
| 21   | VAL     | 32.04                                      | 32.06                 | 32.02    | 32.05    | 0.02                                             | -0.02    | 0.01     |
| 22   | ASP     | 42.38                                      | 42.26                 | 42.35    | 42.28    | -0.12                                            | -0.03    | -0.10    |
| 23   | ALA     | 17.61                                      | 17.61                 | 17.75    | 17.62    | 0.00                                             | 0.13     | 0.00     |
| 24   | GLU     | 29.05                                      | 29.04                 | 28.90    | 29.05    | -0.01                                            | -0.15    | 0.00     |
| 25   | THR     | 67.89                                      | 67.94                 | 67.90    | 67.94    | 0.04                                             | 0.00     | 0.05     |
| 26   | ALA     | 17.55                                      | 17.65                 | 17.50    | 17.60    | 0.10                                             | -0.05    | 0.05     |
| 27   | GLU     | 29.18                                      | 29.08                 | 29.17    | 29.13    | -0.09                                            | -0.01    | -0.05    |
| 28   | LYS     | 32.41                                      | 32.42                 | 32.42    | 32.42    | 0.01                                             | 0.00     | 0.00     |
| 29   | ALA     | 17.40                                      | 17.39                 | 17.39    | 17.39    | -0.01                                            | -0.01    | -0.01    |
| 30   | PHE     | 37.63                                      | 37.72                 | 37.62    | 37.67    | 0.09                                             | 0.00     | 0.05     |
| 31   | LYS     | 31.57                                      | 31.59                 | 31.58    | 31.59    | 0.02                                             | 0.02     | 0.02     |
| 32   | GLN     | 28.25                                      | 28.24                 | 28.25    | 28.26    | -0.01                                            | 0.01     | 0.02     |
| 33   | TYR     | 38.60                                      | 38.53                 | 38.61    | 38.65    | -0.07                                            | 0.02     | 0.06     |
| 34   | ALA     | 17.86                                      | 17.86                 | 17.82    | 17.82    | 0.00                                             | -0.04    | -0.04    |
| 35   | ASN     | 38.78                                      | 38.78                 | 38.84    | 38.83    | 0.00                                             | 0.05     | 0.04     |
| 36   | ASP     | 40.03                                      | 40.06                 | 40.01    | 40.02    | 0.03                                             | -0.02    | -0.01    |
| 37   | ASN     | 40.10                                      | 40.14                 | 40.09    | 40.11    | 0.04                                             | -0.02    | 0.00     |
| 39   | VAL     | 33.39                                      | 33.03                 | 33.41    | 33.42    | -0.35                                            | 0.02     | 0.04     |
| 40   | ASP     | 42.99                                      | 43.26                 | 43.01    | 43.04    | 0.27                                             | 0.02     | 0.05     |
| 42   | VAL     | 33.57                                      | 31.73                 | 31.57    | 31.55    | -                                                | -        | -        |
| 43   | TRP     | 30.27                                      | 30.54                 | 30.53    | 30.48    | 0.27                                             | 0.26     | 0.21     |
| 44   | THR     | 72.37                                      | 72.26                 | 72.39    | 72.37    | -0.11                                            | 0.03     | 0.00     |
| 45   | TYR     | 41.58                                      | 41.59                 | 41.49    | 41.61    | 0.02                                             | -0.09    | 0.04     |
| 46   | ASP     | 43.14                                      | 43.14                 | 42.55    | 43.08    | 0.00                                             | -0.59    | -0.06    |
| 47   | ASP     | 42.18                                      | 42.09                 | 32.49    | 42.07    | -0.09                                            | -        | -0.11    |
| 48   | ALA     | 18.30                                      | 18.33                 | 18.61    | 18.35    | 0.03                                             | 0.31     | 0.04     |
| 49   | THR     | 70.19                                      | 70.20                 | 70.24    | 70.19    | 0.01                                             | 0.05     | 0.01     |
| 50   | LYS     | 29.36                                      | 29.38                 | 29.68    | 29.37    | 0.02                                             | 0.32     | 0.01     |
| 51   | THR     | 72.11                                      | 72.22                 | 71.87    | 72.18    | 0.11                                             | -0.24    | 0.07     |

|                 |     |       |       |       |       |       |       |       |
|-----------------|-----|-------|-------|-------|-------|-------|-------|-------|
| 52              | PHE | 42.64 | 42.30 | 42.52 | 42.51 | -0.34 | -0.12 | -0.13 |
| 53              | THR | 70.99 | 70.83 | 71.00 | 71.02 | -0.16 | 0.01  | 0.03  |
| 54              | VAL | 32.45 | 32.48 | 32.40 | 32.38 | 0.03  | -0.05 | -0.07 |
| 55              | THR | 70.81 | 70.25 | 70.84 | 70.84 | -0.56 | 0.03  | 0.03  |
| 56 <sup>e</sup> | GLU | 32.04 | 30.83 | 32.06 | 32.01 | -1.21 | 0.02  | -0.03 |

---

<sup>a</sup>  $\delta_{C\beta}$  as measured from CT-HN(COCA)CB spectra.

<sup>b</sup>  $\Delta\delta_{C\beta}$  is the  $^{13}\text{C}_{\beta}$  chemical shift difference between wild-type GB3 and mutant. RDCs from residues for which  $|\Delta\delta_{C\beta}| > 0.2$  ppm are excluded from the analysis.

<sup>c</sup> Mutants 1-3 represent K4A/K19E/V42E-CHis<sub>6</sub>, K19A/V42E/D47K and K4A/K19E/V42E respectively.

<sup>d</sup> - indicates the site of mutation.

<sup>e</sup>  $\delta_{C\beta}$  as derived from the DEPT-filtered  $^1\text{H}$ - $^{13}\text{C}$  CT-HSQC spectrum.

**Table S4.  $^1\text{H}^\beta$  Chemical shift for GB3 and three mutants**

| Res# | AA type | proton                   | $\delta_{\text{H}^\beta} / \text{ppm}^a$ |                       |          |          | $\Delta\delta_{\text{H}^\beta} / \text{ppm}^b$ |          |          |
|------|---------|--------------------------|------------------------------------------|-----------------------|----------|----------|------------------------------------------------|----------|----------|
|      |         |                          | GB3                                      | Mutant 1 <sup>c</sup> | Mutant 2 | Mutant 3 | Mutant 1                                       | Mutant 2 | Mutant 3 |
| 1    | MET     | H $\beta$ 2              | 2.20                                     | 2.19                  | 2.23     | 2.19     | -0.01                                          | 0.03     | -0.01    |
| 1    | MET     | H $\beta$ 3              | 2.08                                     | 2.07                  | 2.02     | 2.07     | -0.02                                          | -0.06    | -0.02    |
| 2    | GLN     | H $\beta$ 2              | 1.88                                     | 1.94                  | 1.93     | 1.94     | 0.05                                           | 0.05     | 0.06     |
| 2    | GLN     | H $\beta$ 3              | 2.00                                     | 2.00                  | 1.96     | 2.00     | 0.00                                           | -0.03    | 0.00     |
| 3    | TYR     | H $\beta$ 2              |                                          | 2.73                  | 2.78     | 2.73     |                                                |          |          |
| 3    | TYR     | H $\beta$ 3              | 3.43                                     | 3.40                  | 3.42     | 3.41     | -0.03                                          | 0.00     | -0.02    |
| 4    | LYS     | H $\beta$ 2              | 1.86                                     | -                     | 1.88     | -        | -                                              | 0.01     | -        |
| 4    | LYS     | H $\beta$ 3              | 2.00                                     | - <sup>d</sup>        | 2.01     | -        | -                                              | 0.01     | -        |
| 5    | LEU     | H $\beta$ 2              | -1.21                                    | -1.15                 | -1.17    | -1.17    | 0.06                                           | 0.03     | 0.04     |
| 5    | LEU     | H $\beta$ 3              | 0.74                                     | 0.75                  | 0.76     | 0.72     | 0.01                                           | 0.02     | -0.02    |
| 6    | VAL     | H $\beta$                | 2.05                                     | 1.99                  | 2.09     | 2.04     | -0.07                                          | 0.03     | -0.01    |
| 7    | ILE     | H $\beta$                | 1.54                                     | 1.55                  | 1.54     | 1.53     | 0.01                                           | 0.01     | 0.00     |
| 8    | ASN     | H $\beta$ 2              | 2.50                                     | 2.50                  | 2.49     | 2.50     | 0.00                                           | 0.00     | 0.00     |
| 8    | ASN     | H $\beta$ 3              | 2.94                                     | 2.84                  | 2.96     | 2.94     | -0.10                                          | 0.02     | 0.00     |
| 10   | LYS     | H $\beta$ # <sup>e</sup> | 1.79                                     | 1.73                  | 1.79     | 1.78     | -0.06                                          | 0.01     | 0.00     |
| 11   | THR     | H $\beta$                | 4.17                                     | 4.15                  | 4.18     | 4.17     | -0.02                                          | 0.01     | 0.00     |
| 12   | LEU     | H $\beta$ 2              | 1.36                                     | 1.39                  | 1.36     | 1.36     | 0.03                                           | 0.01     | 0.00     |
| 12   | LEU     | H $\beta$ 3              | 1.56                                     | 1.52                  | 1.57     | 1.56     | -0.04                                          | 0.01     | -0.01    |
| 13   | LYS     | H $\beta$ 2              | 1.70                                     | 1.72                  | 1.71     | 1.70     | 0.02                                           | 0.01     | 0.00     |
| 13   | LYS     | H $\beta$ 3              | 1.85                                     | 1.82                  | 1.86     | 1.85     | -0.03                                          | 0.01     | 0.00     |
| 15   | GLU     | H $\beta$ 2 <sup>f</sup> | 1.89                                     | 1.93                  | 1.91     | 1.94     | 0.03                                           | 0.01     | 0.05     |
| 15   | GLU     | H $\beta$ 3 <sup>f</sup> | 2.01                                     | 2.03                  | 2.02     | 2.07     | 0.03                                           | 0.02     | 0.07     |
| 16   | THR     | H $\beta$                | 3.92                                     | 3.99                  | 3.94     | 3.97     | 0.07                                           | 0.02     | 0.05     |
| 17   | THR     | H $\beta$                | 4.28                                     | 4.30                  | 4.29     | 4.30     | 0.02                                           | 0.01     | 0.03     |
| 18   | THR     | H $\beta$                | 3.77                                     | 3.74                  | 3.78     | 3.75     | -0.04                                          | 0.01     | -0.02    |
| 19   | LYS     | H $\beta$ #              | 1.69                                     | -                     | -        | -        | -                                              | -        | -        |
| 20   | ALA     | H $\beta$ #              | 1.31                                     | 1.31                  | 1.30     | 1.30     | -0.01                                          | -0.01    | -0.01    |
| 21   | VAL     | H $\beta$                | 2.17                                     | 2.16                  | 2.18     | 2.16     | -0.01                                          | 0.01     | -0.01    |
| 22   | ASP     | H $\beta$ 2              | 3.08                                     | 3.08                  |          | 3.07     | 0.00                                           |          | 0.00     |
| 23   | ALA     | H $\beta$ #              | 1.15                                     | 1.15                  | 1.20     | 1.15     | -0.01                                          | 0.05     | 0.00     |
| 24   | GLU     | H $\beta$ 2              | 1.95                                     | 1.95                  | 1.97     | 1.95     | 0.00                                           | 0.02     | 0.00     |
| 24   | GLU     | H $\beta$ 3              | 1.78                                     | 1.79                  | 1.79     | 1.78     | 0.00                                           | 0.00     | 0.00     |
| 25   | THR     | H $\beta$                | 4.00                                     | 4.01                  | 4.00     | 4.01     | 0.01                                           | 0.00     | 0.01     |
| 26   | ALA     | H $\beta$ #              | 0.47                                     | 0.51                  | 0.49     | 0.50     | 0.05                                           | 0.02     | 0.04     |
| 27   | GLU     | H $\beta$ 2              | 1.90                                     | 1.91                  | 1.89     | 1.89     | 0.01                                           | -0.02    | -0.01    |
| 27   | GLU     | H $\beta$ 3              | 1.82                                     |                       |          |          |                                                |          |          |
| 28   | LYS     | H $\beta$ #              | 1.72                                     | 1.72                  | 1.73     | 1.71     | 0.00                                           | 0.01     | 0.00     |
| 29   | ALA     | H $\beta$ #              | 1.18                                     | 1.17                  | 1.18     | 1.17     | -0.01                                          | 0.01     | -0.01    |
| 30   | PHE     | H $\beta$ 2              | 2.83                                     | 2.81                  | 2.84     | 2.81     | -0.01                                          | 0.01     | -0.01    |
| 30   | PHE     | H $\beta$ 3              | 3.33                                     | 3.34                  | 3.34     | 3.33     | 0.01                                           | 0.01     | 0.00     |
| 31   | LYS     | H $\beta$ 2              | 1.59                                     | 1.61                  | 1.59     | 1.59     | 0.02                                           | 0.00     | 0.00     |
| 31   | LYS     | H $\beta$ 3              | 1.49                                     | 1.49                  | 1.50     | 1.49     | 0.00                                           | 0.01     | 0.00     |
| 32   | GLN     | H $\beta$ #              | 2.18                                     | 2.18                  | 2.19     | 2.18     | 0.00                                           | 0.01     | 0.00     |
| 33   | TYR     | H $\beta$ 2              | 3.28                                     | 3.29                  | 3.30     | 3.29     | 0.01                                           | 0.02     | 0.01     |
| 33   | TYR     | H $\beta$ 3              | 3.31                                     | 3.33                  | 3.32     |          | 0.01                                           | 0.01     |          |
| 34   | ALA     | H $\beta$ #              | 1.81                                     | 1.80                  | 1.81     | 1.80     | 0.00                                           | 0.01     | -0.01    |
| 35   | ASN     | H $\beta$ 2              | 2.95                                     | 2.94                  | 2.96     | 2.95     | -0.01                                          | 0.01     | 0.00     |

|    |     |             |       |       |       |       |       |       |       |
|----|-----|-------------|-------|-------|-------|-------|-------|-------|-------|
| 35 | ASN | H $\beta$ 3 | 2.90  | 2.91  | 2.91  | 2.89  | 0.01  | 0.01  | 0.00  |
| 36 | ASP | H $\beta$ 2 | 2.71  | 2.71  | 2.73  | 2.72  | 0.00  | 0.01  | 0.01  |
| 36 | ASP | H $\beta$ 3 | 2.54  | 2.55  | 2.55  | 2.54  | 0.01  | 0.01  | 0.00  |
| 37 | ASN | H $\beta$ 2 | 2.06  | 2.04  | 2.08  | 2.07  | -0.02 | 0.02  | 0.01  |
| 37 | ASN | H $\beta$ 3 | 2.68  | 2.67  | 2.69  | 2.68  | -0.01 | 0.01  | 0.00  |
| 39 | VAL | H $\beta$   | 1.74  | 1.78  | 1.74  | 1.72  | 0.04  | 0.00  | -0.02 |
| 40 | ASP | H $\beta$ 2 | 2.55  | 2.59  | 2.57  | 2.55  | 0.03  | 0.01  | 0.00  |
| 40 | ASP | H $\beta$ 3 | 2.74  | 2.71  | 2.74  | 2.73  | -0.03 | 0.01  | -0.01 |
| 42 | VAL | H $\beta$   | 1.94  | -     | -     | -     | -     | -     | -     |
| 43 | TRP | H $\beta$ 2 | 3.14  |       | 3.14  | 3.13  |       | 0.00  | -0.01 |
| 43 | TRP | H $\beta$ 3 | 3.33  | 3.32  | 3.33  | 3.33  | 0.00  | 0.00  | 0.00  |
| 44 | THR | H $\beta$   | 4.26  | 4.24  | 4.24  | 4.24  | -0.02 | -0.02 | -0.02 |
| 45 | TYR | H $\beta$ 2 | 2.87  | 2.86  |       | 2.86  | -0.01 |       | -0.01 |
| 45 | TYR | H $\beta$ 3 | 2.48  |       | 2.54  |       |       | 0.06  |       |
| 46 | ASP | H $\beta$ 2 | 2.24  | 2.24  | 2.26  | 2.24  | 0.00  | 0.02  | 0.00  |
| 46 | ASP | H $\beta$ 3 | 2.57  | 2.58  | 2.64  | 2.58  | 0.01  | 0.07  | 0.01  |
| 47 | ASP | H $\beta$ 2 | 2.82  | 2.81  | -     | 2.80  | -0.01 | -     | -0.02 |
| 47 | ASP | H $\beta$ 3 | 2.49  | 2.50  | -     | 2.50  | 0.01  | -     | 0.01  |
| 48 | ALA | H $\beta$ # | 1.46  | 1.46  | 1.47  | 1.46  | 0.00  | 0.00  | 0.00  |
| 49 | THR | H $\beta$   | 4.39  | 4.38  | 4.40  | 4.38  | -0.01 | 0.01  | -0.01 |
| 50 | LYS | H $\beta$ 2 | 2.07  | 2.03  | 2.15  | 2.04  | -0.04 | 0.08  | -0.03 |
| 50 | LYS | H $\beta$ 3 | 2.00  | 1.98  | 1.94  | 1.99  | -0.03 | -0.06 | -0.02 |
| 51 | THR | H $\beta$   | 3.75  | 3.72  | 3.74  | 3.72  | -0.03 | -0.01 | -0.03 |
| 52 | PHE | H $\beta$ 2 | 3.25  | 3.27  | 3.26  | 3.28  | 0.02  | 0.01  | 0.03  |
| 52 | PHE | H $\beta$ 3 | 3.20  | 3.17  | 3.22  | 3.21  | -0.03 | 0.02  | 0.01  |
| 53 | THR | H $\beta$   | 3.80  | 3.77  | 3.79  | 3.78  | -0.03 | -0.01 | -0.02 |
| 54 | VAL | H $\beta$   | -0.40 | -0.19 | -0.43 | -0.41 | 0.20  | -0.04 | -0.02 |
| 55 | THR | H $\beta$   | 3.79  | 3.79  | 3.85  | 3.84  | 0.00  | 0.06  | 0.05  |
| 56 | GLU | H $\beta$ 2 | 1.93  | 1.91  | 1.93  | 1.92  | -0.01 | 0.00  | -0.01 |
| 56 | GLU | H $\beta$ 3 | 2.13  | 2.01  | 2.14  | 2.13  | -0.12 | 0.01  | 0.00  |

<sup>a</sup>  $\delta_{\text{H}\beta}$  are measured from the DEPT-filtered  $^1\text{H}$ - $^{13}\text{C}$  CT-HSQC spectrum, not corrected for  $^2\text{H}$ -isotope shift effects

<sup>b</sup>  $\Delta\delta_{\text{H}\beta}$  is the  $^1\text{H}_{\beta}$  chemical shift difference between wild-type GB3 and mutant. RDCs from residues for which  $|\Delta\delta_{\text{H}\beta}| > 0.1$  ppm are excluded from the analysis.

<sup>c</sup> Mutants 1-3 represent K4A/K19E/V42E-CHis<sub>6</sub>, K19A/V42E/D47K and K4A/K19E/V42E respectively.

<sup>d</sup> - indicates the site of mutation.

<sup>e</sup> # represents the two equivalent protons attached to C $^{\beta}$ .

<sup>f</sup> ambiguous stereospecific assignment.

**Table S5. C<sup>β</sup>-related <sup>1</sup>D couplings<sup>a</sup> and their sums (Hz)**

| bicelle <sup>a</sup> |         |     |                                             |       |    |                                             |       |     |                                             |       |                  |       |
|----------------------|---------|-----|---------------------------------------------|-------|----|---------------------------------------------|-------|-----|---------------------------------------------|-------|------------------|-------|
| Res#                 | AA type |     | <sup>1</sup> D <sub>CβCγ</sub> <sup>b</sup> | Error |    | <sup>1</sup> D <sub>CαCB</sub> <sup>c</sup> | Error |     | <sup>1</sup> D <sub>CβHB</sub> <sup>d</sup> | Error | sum <sup>e</sup> | Error |
| 3                    | TYR     | Cγ  | -2.63                                       | 0.35  | Cα | 1.61                                        | 0.07  | Hβ# | 5.21                                        | 0.82  | -4.98            | 3.65  |
| 30                   | PHE     | Cγ  | -0.04                                       | 0.70  | Cα | 1.51                                        | 0.08  | Hβ# | -18.45                                      | 0.46  | -3.76            | 7.02  |
| 33                   | TYR     | Cγ  | 0.16                                        | 0.19  | Cα | 0.19                                        | 0.06  | Hβ# | -4.17                                       | 0.41  | -0.70            | 2.07  |
| 35                   | ASN     | Cγ  | 1.69                                        | 0.09  | Cα | -0.58                                       | 0.06  | Hβ# | -7.47                                       | 0.44  | 3.54             | 1.20  |
| 36                   | ASP     | Cγ  | -1.69                                       | 0.19  | Cα | -1.12                                       | 0.06  | Hβ# | 22.51                                       | 0.32  | -5.64            | 2.04  |
| 37                   | ASN     | Cγ  | 0.87                                        | 0.29  | Cα | 0.57                                        | 0.05  | Hβ# | -17.69                                      | 0.30  | -3.34            | 2.96  |
| 39                   | VAL     | Cγ1 | 1.14                                        | 0.03  | Cα | 0.07                                        | 0.04  | Hβ  | -25.33                                      | 0.24  | -3.02            | 0.59  |
| 39                   | VAL     | Cγ2 | 1.03                                        | 0.02  |    |                                             |       |     |                                             |       |                  |       |
| 40                   | ASP     | Cγ  | 0.92                                        | 0.10  | Cα | -0.07                                       | 0.04  | Hβ# | -10.22                                      | 0.20  | -1.71            | 1.13  |
| 42                   | VAL     | Cγ1 | -1.05                                       | 0.02  | Cα | 1.01                                        | 0.04  | Hβ  | 0.86                                        | 0.57  | -5.41            | 0.72  |
| 42                   | VAL     | Cγ2 | -0.59                                       | 0.02  |    |                                             |       |     |                                             |       |                  |       |
| 43                   | TRP     | Cγ  | 1.70                                        | 0.35  | Cα | -1.22                                       | 0.05  | Hβ# | -5.02                                       | 1.93  | -0.22            | 4.02  |
| 46                   | ASP     | Cγ  | 0.02                                        | 0.17  | Cα | -0.28                                       | 0.06  | Hβ# | -0.22                                       | 1.19  | -2.87            | 2.17  |
| 47                   | ASP     | Cγ  | -1.42                                       | 0.17  | Cα | 0.17                                        | 0.04  | Hβ# | 19.37                                       | 0.20  | 6.79             | 1.76  |
| 54                   | VAL     | Cγ1 | 1.69                                        | 0.04  | Cα | 1.50                                        | 0.06  | Hβ  | -25.52                                      | 0.42  | -3.31            | 0.92  |
| 54                   | VAL     | Cγ2 | -0.97                                       | 0.03  |    |                                             |       |     |                                             |       |                  |       |
| RMS <sup>f</sup>     |         |     |                                             |       |    |                                             |       |     |                                             |       | 3.94             | 2.89  |

| PEG  |         |     |                                             |       |    |                                             |       |     |                                             |       |                  |       |
|------|---------|-----|---------------------------------------------|-------|----|---------------------------------------------|-------|-----|---------------------------------------------|-------|------------------|-------|
| Res# | AA type |     | <sup>1</sup> D <sub>CβCγ</sub> <sup>b</sup> | Error |    | <sup>1</sup> D <sub>CαCB</sub> <sup>c</sup> | Error |     | <sup>1</sup> D <sub>CβHB</sub> <sup>d</sup> | Error | sum <sup>e</sup> | Error |
| 3    | TYR     | Cγ  | -0.87                                       | 0.17  | Cα | 0.99                                        | 0.07  | Hβ# | -1.64                                       | 0.54  | -0.45            | 1.93  |
| 6    | VAL     | Cγ1 | -1.22                                       | 0.01  | Cα | 0.99                                        | 0.06  | Hβ  | 16.02                                       | 0.32  | 1.11             | 0.69  |
| 6    | VAL     | Cγ2 | -1.26                                       | 0.01  |    |                                             |       |     |                                             |       |                  |       |
| 8    | ASN     | Cγ  | -0.77                                       | 0.18  | Cα | 0.97                                        | 0.05  | Hβ# | -3.68                                       | 0.31  | -1.63            | 1.87  |
| 21   | VAL     | Cγ1 | -0.38                                       | 0.01  | Cα | -0.07                                       | 0.04  | Hβ  | 0.66                                        | 0.14  | -1.31            | 0.43  |
| 21   | VAL     | Cγ2 | 0.25                                        | 0.01  |    |                                             |       |     |                                             |       |                  |       |
| 22   | ASP     | Cγ  | 0.16                                        | 0.10  | Cα | 0.90                                        | 0.06  | Hβ# | -12.10                                      | 0.27  | -1.52            | 1.20  |
| 30   | PHE     | Cγ  | -0.62                                       | 0.23  | Cα | 0.80                                        | 0.09  | Hβ# | -3.61                                       | 0.34  | -1.84            | 2.48  |
| 33   | TYR     | Cγ  | 0.62                                        | 0.10  | Cα | -0.54                                       | 0.06  | Hβ# | -2.04                                       | 0.29  | -1.21            | 1.20  |
| 35   | ASN     | Cγ  | 0.56                                        | 0.04  | Cα | 0.46                                        | 0.05  | Hβ# | -9.43                                       | 0.25  | 0.77             | 0.70  |
| 36   | ASP     | Cγ  | 0.00                                        | 0.07  | Cα | -0.92                                       | 0.05  | Hβ# | 9.97                                        | 0.27  | 0.77             | 0.89  |
| 37   | ASN     | Cγ  | 0.58                                        | 0.08  | Cα | -0.15                                       | 0.06  | Hβ# | -0.85                                       | 0.26  | 3.46             | 1.02  |
| 39   | VAL     | Cγ1 | 0.81                                        | 0.01  | Cα | -0.53                                       | 0.05  | Hβ  | -10.93                                      | 0.15  | 2.03             | 0.53  |
| 39   | VAL     | Cγ2 | 1.01                                        | 0.01  |    |                                             |       |     |                                             |       |                  |       |
| 40   | ASP     | Cγ  | 0.84                                        | 0.04  | Cα | -0.63                                       | 0.04  | Hβ# | -2.19                                       | 0.15  | -0.04            | 0.62  |
| 42   | VAL     | Cγ1 | -0.52                                       | 0.01  | Cα | 0.88                                        | 0.01  | Hβ  | 4.08                                        | 0.29  | -2.32            | 0.32  |
| 42   | VAL     | Cγ2 | -1.00                                       | 0.01  |    |                                             |       |     |                                             |       |                  |       |
| 43   | TRP     | Cγ  | 0.90                                        | 0.18  | Cα | 0.08                                        | 0.06  | Hβ# | -6.24                                       | 1.43  | 3.53             | 2.34  |
| 45   | TYR     | Cγ  | -1.50                                       | 0.14  | Cα | -0.12                                       | 0.08  | Hβ# | 18.72                                       | 0.45  | 2.53             | 1.65  |
| 46   | ASP     | Cγ  | -0.04                                       | 0.09  | Cα | 0.67                                        | 0.07  | Hβ# | -3.44                                       | 0.42  | 2.84             | 1.21  |
| 47   | ASP     | Cγ  | -1.39                                       | 0.05  | Cα | 0.61                                        | 0.06  | Hβ# | 7.45                                        | 0.16  | -0.39            | 0.83  |
| 52   | PHE     | Cγ  | -0.63                                       | 0.15  | Cα | 0.84                                        | 0.09  | Hβ# | 1.24                                        | 0.51  | 3.31             | 1.86  |
| RMS  |         |     |                                             |       |    |                                             |       |     |                                             |       | 1.97             | 1.34  |

| Pfl  |         |     |                                             |       |    |                                             |       |     |                                             |       |                  |       |
|------|---------|-----|---------------------------------------------|-------|----|---------------------------------------------|-------|-----|---------------------------------------------|-------|------------------|-------|
| Res# | AA type |     | <sup>1</sup> D <sub>CβCγ</sub> <sup>b</sup> | Error |    | <sup>1</sup> D <sub>CαCB</sub> <sup>c</sup> | Error |     | <sup>1</sup> D <sub>CβHB</sub> <sup>d</sup> | Error | sum <sup>e</sup> | Error |
| 3    | TYR     | Cγ  | -1.65                                       | 0.19  | Cα | -0.14                                       | 0.08  | Hβ# | 14.83                                       | 0.38  | -3.04            | 2.13  |
| 6    | VAL     | Cγ1 | -0.01                                       | 0.01  | Cα | -1.85                                       | 0.06  | Hβ  | -5.44                                       | 0.27  | 1.72             | 0.72  |
| 6    | VAL     | Cγ2 | 2.58                                        | 0.03  |    |                                             |       |     |                                             |       |                  |       |
| 8    | ASN     | Cγ  | 0.47                                        | 0.09  | Cα | -1.89                                       | 0.05  | Hβ# | 11.01                                       | 0.30  | -3.21            | 1.10  |

|     |     |              |       |      |            |       |      |             |        |      |       |      |
|-----|-----|--------------|-------|------|------------|-------|------|-------------|--------|------|-------|------|
| 21  | VAL | C $\gamma$ 1 | 0.71  | 0.01 | C $\alpha$ | -1.36 | 0.04 | H $\beta$   | -4.62  | 0.08 | 0.58  | 0.43 |
| 21  | VAL | C $\gamma$ 2 | 1.17  | 0.01 |            |       |      |             |        |      |       |      |
| 22  | ASP | C $\gamma$   | -0.94 | 0.09 | C $\alpha$ | -1.65 | 0.07 | H $\beta$ # | 27.10  | 0.29 | 1.25  | 1.18 |
| 30  | PHE | C $\gamma$   | 2.47  | 0.31 | C $\alpha$ | -2.14 | 0.12 | H $\beta$ # | -4.55  | 0.56 | -1.28 | 3.35 |
| 33  | TYR | C $\gamma$   | -1.76 | 0.17 | C $\alpha$ | 0.55  | 0.06 | H $\beta$ # | 8.01   | 0.41 | -4.10 | 1.83 |
| 35  | ASN | C $\gamma$   | -0.11 | 0.04 | C $\alpha$ | -1.66 | 0.05 | H $\beta$ # | 18.58  | 0.17 | 0.84  | 0.65 |
| 36  | ASP | C $\gamma$   | -1.41 | 0.13 | C $\alpha$ | 3.76  | 0.08 | H $\beta$ # | -20.43 | 0.35 | 3.04  | 1.60 |
| 37  | ASN | C $\gamma$   | 3.05  | 0.11 | C $\alpha$ | 0.25  | 0.07 | H $\beta$ # | -30.73 | 0.64 | 2.31  | 1.45 |
| 39  | VAL | C $\gamma$ 1 | -1.65 | 0.01 | C $\alpha$ | 1.59  | 0.06 | H $\beta$   | 7.33   | 0.11 | -2.74 | 0.63 |
| 39  | VAL | C $\gamma$ 2 | -0.95 | 0.01 |            |       |      |             |        |      |       |      |
| 40  | ASP | C $\gamma$   | -0.96 | 0.05 | C $\alpha$ | 1.04  | 0.05 | H $\beta$ # | -0.01  | 0.13 | 0.83  | 0.69 |
| 42  | VAL | C $\gamma$ 1 | -1.41 | 0.01 | C $\alpha$ | 0.01  | 0.01 | H $\beta$   | -11.41 | 0.24 | -1.86 | 0.32 |
| 42  | VAL | C $\gamma$ 2 | 2.36  | 0.02 |            |       |      |             |        |      |       |      |
| 43  | TRP | C $\gamma$   | -2.23 | 0.17 | C $\alpha$ | -0.98 | 0.07 | H $\beta$ # | 28.71  | 1.24 | -3.43 | 2.24 |
| 45  | TYR | C $\gamma$   | 4.00  | 0.22 | C $\alpha$ | -1.33 | 0.09 | H $\beta$ # | -21.10 | 0.32 | 5.60  | 2.40 |
| 46  | ASP | C $\gamma$   | -1.17 | 0.08 | C $\alpha$ | -1.84 | 0.07 | H $\beta$ # | 29.04  | 0.28 | -1.10 | 1.12 |
| 47  | ASP | C $\gamma$   | 1.41  | 0.09 | C $\alpha$ | -1.88 | 0.06 | H $\beta$ # | 3.82   | 0.23 | -0.90 | 1.10 |
| 52  | PHE | C $\gamma$   | -0.95 | 0.18 | C $\alpha$ | -1.93 | 0.11 | H $\beta$ # | 28.92  | 0.48 | 0.17  | 2.19 |
| RMS |     |              |       |      |            |       |      |             |        | 2.53 | 1.58  |      |

<sup>a</sup>The sum of C $\beta$ -related <sup>1</sup>D couplings for three media: bicelle, PEG and Pf1, in which the RDCs have been scaled to the <sup>1</sup>D<sub>a</sub>(CH) alignment strengths of 18.80, 12.62, and 19.70 Hz, respectively. Only residues having four C $\beta$ -related one-bond RDCs available are listed.

<sup>b</sup><sup>1</sup>D<sub>C $\beta$ C $\gamma$  RDCs were measured from the <sup>1</sup>H-<sup>13</sup>C CT-HSQC spectrum for aromatic <sup>13</sup>C $\gamma$ , and from the non-CT <sup>1</sup>H-<sup>13</sup>C HSQC spectrum for methyl <sup>13</sup>C $\gamma$ .</sub>

<sup>c</sup><sup>1</sup>D<sub>C $\alpha$ C $\beta$  RDCs were measured from <sup>1</sup>H-<sup>13</sup>C HSQC and HN(CO)CA spectra.</sub>

<sup>d</sup>The sum of <sup>1</sup>D<sub>C $\beta$ H $\beta$ 2 and <sup>1</sup>D<sub>C $\beta$ H $\beta$ 3 RDCs were measured from the CT-HN(COCA)CB spectrum.</sub></sub>

<sup>e</sup>The weighted sum of C $\beta$ -related <sup>1</sup>D, using (<sup>1</sup>D<sub>C $\beta$ C $\gamma$  + <sup>1</sup>D<sub>C $\alpha$ C $\beta$ ) × 10 + <sup>1</sup>D<sub>C $\beta$ H $\beta$ .</sub></sub></sub>

<sup>f</sup>The RMS value of the weighted sum of C $\beta$ -related <sup>1</sup>D, which is about 0.21, 0.16 and 0.13 times <sup>1</sup>D<sub>a</sub>(CH) for bicelle, PEG and Pf1, respectively.

**Table S6. Experimental  $^1J_{CaCB}$  and  $^1D_{CaCB}$  for GB3 (Hz)**

| RES# | AA type | A <sup>a</sup>            |       | B                         |       | C                         |       | D                         |       |
|------|---------|---------------------------|-------|---------------------------|-------|---------------------------|-------|---------------------------|-------|
|      |         | $^1J_{CaCB}$ <sup>b</sup> | error | $^1D_{CaCB}$ <sup>c</sup> | error | $^1D_{CaCB}$ <sup>b</sup> | error | $^1D_{CaCB}$ <sup>b</sup> | error |
| 1    | MET     | 33.09                     | 0.04  |                           |       | 1.59                      | 0.07  | -0.13                     | 0.08  |
| 2    | GLN     | 35.34                     | 0.03  | 1.47                      | 0.05  | 1.20                      | 0.05  | -0.75                     | 0.06  |
| 3    | TYR     | 32.61                     | 0.04  | 1.61                      | 0.07  | 0.99                      | 0.07  | -0.14                     | 0.08  |
| 4    | LYS     | 33.77                     | 0.05  | 0.66                      | 0.08  | 0.73                      | 0.08  | -1.85                     | 0.09  |
| 5    | LEU     | 34.46                     | 0.08  | 1.18                      | 0.12  | 0.55                      | 0.12  | -1.80                     | 0.14  |
| 6    | VAL     | 34.98                     | 0.04  | 1.38                      | 0.06  | 0.99                      | 0.06  | -1.85                     | 0.06  |
| 7    | ILE     | 36.04                     | 0.04  | 1.70                      | 0.08  | 0.97                      | 0.07  | -1.88                     | 0.08  |
| 8    | ASN     | 42.29                     | 0.03  | 2.00                      | 0.05  | 0.97                      | 0.05  | -1.89                     | 0.05  |
| 10   | LYS     | 33.36                     | 0.03  | 0.01                      | 0.06  | -0.68                     | 0.05  | 2.46                      | 0.07  |
| 11   | THR     | 37.24                     | 0.01  | 0.30                      | 0.02  | -0.36                     | 0.01  | -1.37                     | 0.03  |
| 12   | LEU     | 34.49                     | 0.04  | -0.82                     | 0.06  | 0.34                      | 0.06  | -1.37                     | 0.07  |
| 13   | LYS     | 34.82                     | 0.04  | -0.52                     | 0.06  | 0.24                      | 0.06  | -1.37                     | 0.07  |
| 15   | GLU     | 33.28                     | 0.03  | 0.61                      | 0.04  | -0.03                     | 0.04  | -0.49                     | 0.05  |
| 16   | THR     | 38.21                     | 0.03  | 0.90                      | 0.04  | 0.30                      | 0.04  | -1.38                     | 0.04  |
| 17   | THR     | 36.30                     | 0.03  | 0.59                      | 0.04  | -0.32                     | 0.05  | 1.97                      | 0.06  |
| 18   | THR     | 37.26                     | 0.02  | 1.28                      | 0.04  | 0.53                      | 0.04  | 0.98                      | 0.05  |
| 19   | LYS     | 34.96                     | 0.04  | 0.85                      | 0.05  | 0.10                      | 0.06  | 3.16                      | 0.08  |
| 20   | ALA     | 33.70                     | 0.03  | -0.60                     | 0.07  | -0.88                     | 0.05  | 3.89                      | 0.06  |
| 21   | VAL     | 33.01                     | 0.03  | -1.37                     | 0.04  | -0.07                     | 0.04  | -1.36                     | 0.04  |
| 22   | ASP     | 35.46                     | 0.04  | 0.32                      | 0.05  | 0.90                      | 0.06  | -1.65                     | 0.07  |
| 23   | ALA     | 33.51                     | 0.03  | 1.96                      | 0.05  | 1.18                      | 0.05  | -0.87                     | 0.06  |
| 24   | GLU     | 33.28                     | 0.03  | -0.38                     | 0.05  | 0.44                      | 0.05  | -1.85                     | 0.05  |
| 25   | THR     | 36.52                     | 0.04  | -1.79                     | 0.08  | -1.40                     | 0.06  | 3.37                      | 0.08  |
| 26   | ALA     | 33.30                     | 0.03  | 0.98                      | 0.05  | 0.54                      | 0.05  | -1.46                     | 0.06  |
| 27   | GLU     | 32.90                     | 0.04  | 2.86                      | 0.08  | 1.77                      | 0.06  | -0.48                     | 0.07  |
| 28   | LYS     | 33.01                     | 0.04  | -2.20                     | 0.10  | -0.48                     | 0.07  | -0.78                     | 0.07  |
| 29   | ALA     | 33.23                     | 0.03  | -0.15                     | 0.06  | -0.78                     | 0.04  | 3.36                      | 0.06  |
| 30   | PHE     | 34.68                     | 0.06  | 1.51                      | 0.08  | 0.80                      | 0.09  | -2.14                     | 0.12  |
| 31   | LYS     | 33.19                     | 0.04  | 1.65                      | 0.07  | 1.38                      | 0.06  | -1.07                     | 0.07  |
| 32   | GLN     | 33.48                     | 0.03  | -1.91                     | 0.05  | -0.82                     | 0.05  | 1.68                      | 0.06  |
| 33   | TYR     | 32.12                     | 0.03  | 0.19                      | 0.06  | -0.54                     | 0.06  | 0.55                      | 0.06  |
| 34   | ALA     | 33.14                     | 0.03  | 2.82                      | 0.06  | 1.64                      | 0.05  | -1.23                     | 0.05  |
| 35   | ASN     | 34.26                     | 0.03  | -0.58                     | 0.06  | 0.46                      | 0.05  | -1.66                     | 0.05  |
| 36   | ASP     | 35.98                     | 0.03  | -1.12                     | 0.06  | -0.92                     | 0.05  | 3.76                      | 0.08  |
| 37   | ASN     | 36.19                     | 0.03  | 0.57                      | 0.05  | -0.15                     | 0.06  | 0.25                      | 0.07  |
| 39   | VAL     | 34.42                     | 0.03  | 0.07                      | 0.04  | -0.53                     | 0.05  | 1.59                      | 0.06  |
| 40   | ASP     | 37.32                     | 0.03  | -0.07                     | 0.04  | -0.63                     | 0.04  | 1.04                      | 0.05  |
| 42   | VAL     | 34.11                     | 0.01  | 1.01                      | 0.04  | 0.88                      | 0.01  | 0.01                      | 0.01  |
| 43   | TRP     | 33.04                     | 0.04  | -1.22                     | 0.05  | 0.08                      | 0.06  | -0.98                     | 0.07  |
| 44   | THR     | 36.86                     | 0.03  | -0.28                     | 0.04  | 0.47                      | 0.04  | -1.39                     | 0.05  |
| 45   | TYR     | 32.93                     | 0.05  | -1.63                     | 0.07  | -0.12                     | 0.08  | -1.33                     | 0.09  |
| 46   | ASP     | 37.10                     | 0.04  | -0.28                     | 0.06  | 0.67                      | 0.07  | -1.84                     | 0.07  |
| 47   | ASP     | 33.58                     | 0.03  | 0.17                      | 0.04  | 0.61                      | 0.06  | -1.88                     | 0.06  |
| 48   | ALA     | 33.31                     | 0.03  | 0.52                      | 0.06  | 0.77                      | 0.05  | -1.03                     | 0.06  |
| 49   | THR     | 39.14                     | 0.03  | -3.65                     | 0.05  | -1.67                     | 0.05  | -0.01                     | 0.04  |
| 50   | LYS     | 38.70                     | 0.05  | -0.69                     | 0.07  | -0.58                     | 0.07  | 3.37                      | 0.09  |
| 51   | THR     | 36.55                     | 0.04  | -0.63                     | 0.06  | 0.43                      | 0.06  | -1.74                     | 0.07  |
| 52   | PHE     | 33.23                     | 0.06  | 1.02                      | 0.07  | 0.84                      | 0.09  | -1.93                     | 0.11  |
| 53   | THR     | 36.78                     | 0.03  | 0.83                      | 0.06  | 0.84                      | 0.05  | -1.40                     | 0.06  |
| 54   | VAL     | 34.62                     | 0.04  | 1.50                      | 0.06  | 0.94                      | 0.06  | -1.88                     | 0.07  |



|    |     |       |      |      |      |      |      |       |      |
|----|-----|-------|------|------|------|------|------|-------|------|
| 55 | THR | 37.99 | 0.03 | 2.14 | 0.05 | 1.26 | 0.05 | -1.73 | 0.06 |
| 56 | GLU | 33.95 | 0.03 |      |      |      |      |       |      |

<sup>a</sup> A-D represent isotropic GB3 and GB3 in three liquid crystalline media: bicelle, PEG, and Pfl, respectively. <sup>1</sup>J<sub>CaCβ</sub> and <sup>1</sup>D<sub>CaCβ</sub> were measured from <sup>1</sup>H-<sup>13</sup>C HSQC and HN(CO)CA spectra.

<sup>b</sup> <sup>1</sup>J<sub>CaCβ</sub> or <sup>1</sup>D<sub>CaCβ</sub> represents the average of <sup>1</sup>H-<sup>13</sup>C HSQC and HN(CO)CA derived values

<sup>c</sup> <sup>1</sup>D<sub>CaCβ</sub> is from HN(CO)CA only.

**Table S7.** Structural statistics for the deposited models

|                                                                              |       |
|------------------------------------------------------------------------------|-------|
| Conformational restraints                                                    |       |
| H-bonding PMF restraints                                                     | 34    |
| Through H-bond C'-N J-coupling restraints                                    | 32    |
| $H^N-H^\alpha$ $^3J$ coupling restraints                                     | 48    |
| $C'-C'$ $^3J$ coupling restraints                                            | 39    |
| Residual dipolar coupling restraints, N- $H^N$                               | 1235  |
| Residual dipolar coupling restraints, $C^\alpha-H^\alpha$                    | 884   |
| Residual dipolar coupling restraints, $H^N-H^\alpha$                         | 89    |
| Residual dipolar coupling restraints, $C'-C^\alpha$                          | 588   |
| Residual dipolar coupling restraints, $C^\alpha-C^\beta$                     | 154   |
| Residual dipolar coupling restraints, C'-N                                   | 264   |
| Residual restraint violations                                                |       |
| H-bonding PMF energies (kT)                                                  | -4.3  |
| Through H-bond C'-N J-coupling restraints (Hz)                               | 0.11  |
| $H^N-H^\alpha$ $^3J$ coupling restraints (Hz)                                | 0.29  |
| $C'-C'$ $^3J$ coupling restraints (Hz)                                       | 0.11  |
| Residual dipolar coupling restraints, N- $H^N$ (average Q-factor)            | 0.078 |
| Residual dipolar coupling restraints, $C^\alpha-H^\alpha$ (average Q-factor) | 0.077 |
| Residual dipolar coupling restraints, $H^N-H^\alpha$ (average Q-factor)      | 0.045 |
| Residual dipolar coupling restraints, $C'-C^\alpha$ (average Q-factor)       | 0.094 |
| Residual dipolar coupling restraints, $C^\alpha-C^\beta$ (average Q-factor)  | 0.050 |
| Residual dipolar coupling restraints, C'-N (average Q-factor)                | 0.111 |
| Model quality                                                                |       |
| Rmsd bond length (Å)                                                         | 0.009 |
| Rmsd bond angles (°)                                                         | 1.1   |
| Rmsd improper torsion angles (°)                                             | 2.1   |
| MolProbity Ramachandran statistics                                           |       |
| Favored regions (%)                                                          | 98.1  |
| Allowed regions (%)                                                          | 100.0 |
| Disallowed regions (%)                                                       | 0.0   |
| Global quality scores                                                        |       |
| MolProbity clashes/1000 atoms                                                | 6.0   |
| PROCHECK G-factor                                                            | 0.18  |
| Model contents                                                               |       |
| Ordered residue ranges                                                       | 1-56  |
| Total number of residues                                                     | 56    |
| BMRB accession number                                                        | 25807 |
| PDB ID code                                                                  | 2N7J  |

**Table S8. Analysis of  $\chi_1$  rotamer distributions in GB3**

| Res | N <sub>RDC</sub> <sup>a</sup> | Model <sup>b</sup> | P <sup>c</sup>    | $\rho(1)^d$ | $\sigma_\rho(1)^e$ | $\bar{\chi}_1(1)^f$ | $\sigma_{\chi_1(1)}^g$ | $\rho(2)^d$ | $\bar{\chi}_1(2)^f$ | $\sigma_{\chi_1(2)}^g$ | $\rho(3)^d$ | $\bar{\chi}_1(3)^f$ | $\chi_1^i$ |              |      |      |      |      |      |      |      |
|-----|-------------------------------|--------------------|-------------------|-------------|--------------------|---------------------|------------------------|-------------|---------------------|------------------------|-------------|---------------------|------------|--------------|------|------|------|------|------|------|------|
|     |                               |                    |                   |             |                    |                     |                        |             |                     |                        |             |                     | i          | ii           | iii  | iv   | v    | vi   | vii  | viii | ix   |
| M1  | 11                            | 2                  | <10 <sup>-4</sup> | 0.53        | 0.04               | 306                 | 12                     | 0.47        | 203                 | 15                     | -           | -                   | -          | -80          | -164 | -76  | -    | -72  | -142 | -144 |      |
| Q2  | 10                            | 2                  | <10 <sup>-4</sup> | 0.69        | 0.02               | 176                 | 5                      | 0.31        | 265                 | 11                     | -           | -                   | -          | 176          | -62  | -61  | -67  | -71  | -60  | -59  |      |
| Y3  | 15                            | 1                  | 0.59              | 1.0         | -                  | 298                 | 1                      | -           | -                   | -                      | -           | -                   | -66        | -66          | -60  | -66  | -61  | -61  | -62  | -63  | -64  |
| K4  | 8                             | 2                  | <10 <sup>-4</sup> | 0.67        | 0.02               | 183                 | 3                      | 0.33        | 293                 | 5                      | -           | -                   | 178        | 179          | 170  | -173 | -66  | -72  | 172  | -58  | -61  |
| L5  | 7                             | 1                  | 0.98              | 1.0         | -                  | 173                 | 1                      | -           | -                   | -                      | -           | -                   | 176        | 178          | 175  | 175  | 176  | 174  | 176  | 175  | 176  |
| V6  | 11                            | 1                  | 0.89              | 1.0         | -                  | 178                 | 1                      | -           | -                   | -                      | -           | -                   | 172        | 174          | -60  | -53  | -63  | -53  | -59  | -64  | -65  |
| I7  | 10                            | 1                  | 0.39              | 1.0         | -                  | 299                 | 1                      | -           | -                   | -                      | -           | -                   | -47        | -54/<br>-168 | -57  | -67  | -58  | -64  | -55  | -68  | -68  |
| N8  | 12                            | 2                  | <10 <sup>-4</sup> | 0.58        | 0.01               | 190                 | 2                      | 0.42        | 296                 | 3                      | -           | -                   | -66        | -67          | -173 | -168 | -65  | -63  | 177  | -175 | -176 |
| K10 | 5                             | 3                  | -                 | 0.58        | 0.04               | 293                 | 3                      | 0.23        | 187                 | 3                      | 0.19        | 57                  | -81        | -75          | -75  | -76  | -72  | -65  | -57  | -71  | -77  |
| T11 | 10                            | 3                  | 0.09              | 0.63        | 0.03               | 54                  | 3                      | 0.28        | 282                 | 7                      | 0.09        | 162                 | -102       | 66           | -61  | -151 | -70  | 57   | 66   | 60   | 58   |
| K13 | 10                            | 3                  | 0.005             | 0.67        | 0.02               | 302                 | 2                      | 0.16        | 62                  | 12                     | 0.16        | 160                 | -59        | -57          | -64  | -63  | -62  | -172 | -67  | -71  | -71  |
| E15 | 8                             | 3                  | 0.004             | 0.44        | 0.01               | 285                 | 3                      | 0.34        | 40                  | 4                      | 0.22        | 163                 | -61        | -65 /<br>-39 | -60  | -58  | -69  | -172 | 179  | -175 | -175 |
| T16 | 10                            | 2                  | <10 <sup>-4</sup> | 0.74        | 0.01               | 186                 | 2                      | 0.26        | 37                  | 8                      | -           | -                   | -172       | -171         | 62   | -52  | -171 | -61  | -59  | -170 | -171 |
| T17 | 10                            | 2                  | <10 <sup>-4</sup> | 0.76        | 0.01               | 65                  | 1                      | 0.24        | 195                 | 7                      | -           | -                   | 66         | 67           | 67   | 66   | 61   | -56  | 62   | 69   | 79   |
| T18 | 10                            | 1                  | 0.10              | 1.0         | -                  | 197                 | 1                      | -           | -                   | -                      | -           | -                   | -161       | 159          | -162 | -158 | -162 | 68   | 64   | -167 | -168 |
| V21 | 13                            | 2                  | 0.0002            | 0.60        | 0.05               | 302                 | 3                      | 0.40        | 68                  | 4                      | -           | -                   | -66        | -65 /<br>75  | -85  | -70  | 62   | -66  | -66  | -80  | -76  |
| D22 | 15                            | 1                  | 1.0               | 1.0         | -                  | 61                  | 1                      | -           | -                   | -                      | -           | -                   | 60         | 62           | 72   | 54   | 51   | 63   | 61   | 64   | 63   |
| E24 | 10                            | 2                  | <10 <sup>-4</sup> | 0.53        | 0.02               | 284                 | 6                      | 0.47        | 182                 | 5                      | -           | -                   | 97         | 178          | -    | -    | -    | -    | -    | -    | -    |
| E27 | 10                            | 2                  | 0.08              | 0.93        | 0.03               | 185                 | 3                      | 0.07        | 286                 | 34                     | -           | -                   | -177       | -176         | -168 | -178 | -164 | -171 | -176 | -173 | -172 |
| K28 | 5                             | 1                  | 1.0               | 1.0         | -                  | 305                 | 3                      | -           | -                   | -                      | -           | -                   | -80        | -72          | -76  | -69  | -56  | 177  | -172 | -68  | -72  |
| F30 | 15                            | 1                  | 0.35              | 1.0         | -                  | 289                 | 1                      | -           | -                   | -                      | -           | -                   | -74        | -71          | -76  | -71  | -67  | -76  | -77  | -75  | -76  |
| K31 | 10                            | 2                  | <10 <sup>-4</sup> | 0.84        | 0.01               | 285                 | 2                      | 0.16        | 181                 | 9                      | -           | -                   | -64        | -74          | -83  | -77  | -72  | -79  | -78  | -76  | -75  |
| Q32 | 5                             | 2                  | 0.05              | 0.72        | 0.04               | 174                 | 6                      | 0.28        | 297                 | 15                     | -           | -                   | -177       | -174         | 176  | -57  | 179  | 177  | 178  | -178 | -177 |
| Y33 | 14                            | 1                  | 0.009             | 1.0         | -                  | 179                 | 1                      | -           | -                   | -                      | -           | -                   | 165        | 166          | 177  | 168  | -165 | -69  | -68  | 164  | 164  |

|                  |    |   |                   |      |      |     |    |      |     |    |   |   |      |              |      |      |      |      |      |      |      |
|------------------|----|---|-------------------|------|------|-----|----|------|-----|----|---|---|------|--------------|------|------|------|------|------|------|------|
| N35              | 15 | 2 | <10 <sup>-4</sup> | 0.52 | 0.01 | 184 | 2  | 0.48 | 288 | 3  | - | - | -71  | -171/<br>-69 | -108 | 175  | -174 | -172 | -177 | -67  | -68  |
| D36              | 15 | 2 | 0.04              | 0.95 | 0.11 | 290 | 4  | 0.05 | 188 | 40 | - | - | -73  | -69          | -71  | -68  | 79   | -73  | -71  | -80  | -80  |
| N37              | 15 | 1 | 1.0               | 1.0  | -    | 285 | 1  | -    | -   | -  | - | - | -71  | -72          | -74  | -73  | -70  | -65  | -66  | -72  | -72  |
| V39              | 15 | 2 | <10 <sup>-4</sup> | 0.83 | 0.02 | 178 | 2  | 0.17 | 324 | 9  | - | - | 171  | 173          | 177  | -180 | -72  | 177  | 172  | 174  | 178  |
| D40 <sup>h</sup> | 15 | 2 | <10 <sup>-4</sup> | 0.69 | 0.13 | 179 | 11 | 0.31 | 237 | 15 | - | - | 179  | -174         | 180  | -176 | -152 | -63  | -156 | 178  | -165 |
| V42              | 9  | 2 | 0.0005            | 0.83 | 0.02 | 171 | 1  | 0.17 | 35  | 6  | - | - | -62  | -63          | -71  | -74  | -72  | -68  | -53  | -72  | -53  |
| W43              | 11 | 1 | 1.0               | 1.0  | -    | 287 | 1  | -    | -   | -  | - | - | -66  | -68          | -70  | -73  | -72  | -70  | -72  | -68  | -69  |
| T44              | 10 | 2 | 0.001             | 0.84 | 0.02 | 48  | 1  | 0.16 | 270 | 6  | - | - | 62   | 63           | 72   | 71   | 63   | 65   | 70   | 65   | 67   |
| Y45              | 15 | 1 | 1.0               | 1.0  | -    | 178 | 2  | -    | -   | -  | - | - | 174  | 175          | 174  | 173  | 177  | -179 | 178  | 178  | 180  |
| D46              | 15 | 2 | 0.0007            | 0.90 | 0.03 | 179 | 1  | 0.10 | 30  | 17 | - | - | -176 | -172         | -172 | -162 | 172  | -177 | -174 | -174 | -173 |
| D47              | 15 | 2 | <10 <sup>-4</sup> | 0.82 | 0.02 | 189 | 3  | 0.18 | 98  | 12 | - | - | -162 | -162         | -172 | -161 | -25  | 47   | -163 | -88  | 77   |
| T49              | 10 | 1 | 1.0               | 1.0  | -    | 63  | 2  | -    | -   | -  | - | - | 63   | 65           | 61   | 68   | 59   | 66   | 66   | 68   | 66   |
| K50              | 10 | 1 | 1.0               | 1.0  | -    | 299 | 1  | -    | -   | -  | - | - | -48  | -51          | -58  | -50  | -62  | -70  | -46  | -59  | -59  |
| T51              | 5  | 1 | 0.92              | 1.0  | -    | 298 | 1  | -    | -   | -  | - | - | -58  | -60          | -61  | -63  | -60  | -63  | -58  | -57  | -57  |
| F52              | 15 | 1 | 1.0               | 1.0  | -    | 287 | 1  | -    | -   | -  | - | - | -68  | -65          | -68  | -64  | -70  | -64  | -63  | -66  | -66  |
| T53              | 10 | 2 | 0.06              | 0.90 | 0.03 | 301 | 2  | 0.10 | 86  | 25 | - | - | -53  | -52          | 69   | 73   | -58  | 86   | -58  | 67   | 66   |
| V54              | 15 | 2 | 0.0003            | 0.81 | 0.04 | 57  | 2  | 0.19 | 205 | 7  | - | - | 58   | 62           | 59   | 59   | 57   | 62   | 60   | 56   | 58   |
| T55              | 6  | 1 | 0.06              | 1.0  | -    | 303 | 1  | -    | -   | -  | - | - | -177 | -174         | -58  | -55  | -63  | -62  | -59  | -73  | -74  |
| E56              | 9  | 2 | <10 <sup>-4</sup> | 0.56 | 0.02 | 286 | 7  | 0.44 | 184 | 8  | - | - | -75  | -66          | -64  | -70  | -171 | -165 | -63  | -76  | -68  |

<sup>a</sup> N<sub>RDC</sub> is the total number of experimental RDCs available for sidechain rotamer analysis with a maximum of 5 per vector, as the 6<sup>th</sup> RDC is a linear combination of the other 5.

<sup>b</sup> Model refers to the number of discrete  $\chi_1$  rotamers required to fit the data

<sup>c</sup>  $P$  refers to the probability, extracted from F statistics. For cases where model 1 is selected,  $P$  refers to the probability that model 1 is more applicable than model 2; for cases where model 2 is selected,  $P$  refers to the probability that model 2 is not better than model 1; for cases where model 3 is selected,  $P$  refers to the probability that model 3 is not better than model 2.

<sup>d</sup> Fractional population of rotamer ( $n$ )

<sup>e</sup> Uncertainty in fractional population of rotamer 1.

<sup>f</sup>  $\chi_1$  angle of rotamer ( $n$ )

<sup>g</sup> Uncertainty in  $\chi_1$  angle of rotamer ( $n$ )

<sup>h</sup> Values for this residue may be less accurate as they were derived under the assumption of a static C <sup>$\alpha$</sup> -C <sup>$\beta$</sup>  bond orientation, whereas the backbone of this residue is known to undergo substantial dynamics.<sup>8,9</sup>

<sup>i</sup>χ<sub>1</sub> angle of (i) 1IGD, (ii) 2IGD, (iii) 2GI9 (wild type GB1), (iv) 2QMT (GB1 with T2Q), (v) 2ZW0 (mutations D36E, N37H, D47P, A48E), (vi) 3FIL\_ChainA (T2Q, E15V, T16L, T18I, N37L), (vii) 3FIL\_ChainB (viii) 3MP9\_ChainA (2 chains, A and B of wild type GB1) and (ix) 3MP9\_ChainB. The red color indicates a residue type difference relative to wild type GB3; blue indicates a difference relative to the major rotamer determined by our NMR data.

---

**Table S9.  $^3J_{\text{H}\alpha\text{-H}\beta}$  in wild-type GB3**

| Res# | AA type | $^3J_{\text{H}\alpha\text{-H}\beta 2}$ / Hz | $^3J_{\text{H}\alpha\text{-H}\beta 3}$ / Hz |
|------|---------|---------------------------------------------|---------------------------------------------|
| 1    | MET     | 5.8                                         | 6.1                                         |
| 2    | GLN     | 5.4                                         | 8.0                                         |
| 3    | TYR     | 10.5                                        | 3.1                                         |
| 4    | LYS     | 6.4                                         | 8.0                                         |
| 5    | LEU     | 5.3                                         | 11.8                                        |
| 6    | VAL     |                                             | 9.6                                         |
| 7    | ILE     |                                             | 10.1                                        |
| 8    | ASN     | 6.3                                         | 7.1                                         |
| 11   | THR     |                                             | 5.0                                         |
| 12   | LEU     | 4.6                                         | 9.2                                         |
| 13   | LYS     | 9.3                                         | 4.6                                         |
| 15   | GLU     | 6.0                                         | 4.7                                         |
| 16   | THR     |                                             | 2.2                                         |
| 17   | THR     |                                             | 3.9                                         |
| 18   | THR     |                                             | 3.1                                         |
| 20   | ALA     |                                             | 5.8                                         |
| 21   | VAL     |                                             | 4.1                                         |
| 22   | ASP     | 4.2                                         | 2.8                                         |
| 23   | ALA     |                                             | 6.8                                         |
| 24   | GLU     | 6.6                                         | 6.9                                         |
| 25   | THR     |                                             | 8.0                                         |
| 26   | ALA     |                                             | 6.6                                         |
| 27   | GLU     | 5.3                                         | 9.1                                         |
| 29   | ALA     |                                             | 6.7                                         |
| 30   | PHE     | 10.1                                        | 2.8                                         |
| 31   | LYS     | 8.4                                         | 4.4                                         |
| 34   | ALA     |                                             | 6.5                                         |
| 36   | ASP     | 9.4                                         | 2.9                                         |
| 37   | ASN     | 9.6                                         | 2.2                                         |
| 39   | VAL     |                                             | 9.0                                         |
| 40   | ASP     | 3.5                                         | 8.0                                         |
| 42   | VAL     |                                             | 8.4                                         |
| 43   | TRP     | 9.9                                         | 3.0                                         |
| 44   | THR     |                                             | 3.2                                         |
| 45   | TYR     | 6.3                                         | 11.6                                        |
| 46   | ASP     | 4.0                                         | 9.8                                         |
| 47   | ASP     | 4.3                                         | 10.2                                        |
| 48   | ALA     |                                             | 7.1                                         |
| 51   | THR     |                                             | 9.2                                         |
| 53   | THR     |                                             | 8.0                                         |
| 54   | VAL     |                                             | 4.2                                         |
| 55   | THR     |                                             | 8.2                                         |

<sup>a</sup> Wild-type isotropic GB3, uniformly  $\{^{13}\text{C}, ^{15}\text{N}\}$ -enriched in 95% H<sub>2</sub>O, 5% D<sub>2</sub>O, 20 mM sodium phosphate buffer, 50 mM sodium chloride, pH 6.5, and 0.05% sodium azide.  $^3J_{\text{H}\alpha\text{H}\beta}$  values were measured from a 600 MHz 3D HA[HN,HB](CACO)NH spectrum.

**Table S10.  ${}^3J_{\text{H}\alpha\text{H}\beta}$  Karplus equations for different types of amino acids<sup>a</sup>.**

| Coupling type                                      | A    | B     | C    | D    |
|----------------------------------------------------|------|-------|------|------|
| Non-S/T/V- ${}^3J_{\text{H}\alpha\text{H}\beta 2}$ | 9.59 | -0.99 | 0.58 | 1.22 |
| Non-S/T/V- ${}^3J_{\text{H}\alpha\text{H}\beta 3}$ | 9.58 | -0.98 | 0.31 | 1.22 |
| Ser- ${}^3J_{\text{H}\alpha\text{H}\beta 2}$       | 8.55 | -0.99 | 1.70 | 1.42 |
| Ser- ${}^3J_{\text{H}\alpha\text{H}\beta 3}$       | 8.55 | -0.99 | 0.81 | 1.42 |
| Thr- ${}^3J_{\text{H}\alpha\text{H}\beta}$         | 7.14 | -0.91 | 1.26 | 1.06 |
| Val- ${}^3J_{\text{H}\alpha\text{H}\beta}$         | 8.58 | -0.91 | 0.35 | 0.95 |

<sup>a</sup> A-D correspond to the coefficients in the Haasnoot-modified Karplus relation  ${}^3J_{\text{H}\alpha\text{H}\beta}(\theta) = A \cos^2\theta + B \cos\theta + C \sin(2\theta) + D$

**Table S11. Isotropic  $^1J_{\text{C}\beta\text{H}\beta}$  for GB3 (Hz)**

| Res# | AA type | proton <sup>a</sup>      | $^1J_{\text{C}\beta\text{H}\beta}$ <sup>b</sup> | Res# | AA type | proton <sup>a</sup>      | $^1J_{\text{C}\beta\text{H}\beta}$ <sup>b</sup> |
|------|---------|--------------------------|-------------------------------------------------|------|---------|--------------------------|-------------------------------------------------|
| 1    | MET     | H $\beta$ 2              | 131.6                                           | 31   | LYS     | H $\beta$ 2              | 129.3                                           |
| 1    | MET     | H $\beta$ 3              | 131.8                                           | 31   | LYS     | H $\beta$ 3              | 128.9                                           |
| 2    | GLN     | H $\beta$ 2              |                                                 | 32   | GLN     | H $\beta$ # <sup>d</sup> | 132.4                                           |
| 2    | GLN     | H $\beta$ 3              |                                                 | 33   | TYR     | H $\beta$ 2              | 130.7                                           |
| 3    | TYR     | H $\beta$ 2              |                                                 | 33   | TYR     | H $\beta$ 3              | 127.5                                           |
| 3    | TYR     | H $\beta$ 3              | 126.9                                           | 35   | ASN     | H $\beta$ 2              | 131.6                                           |
| 4    | LYS     | H $\beta$ 2              | 129.4                                           | 35   | ASN     | H $\beta$ 3              | 130.4                                           |
| 4    | LYS     | H $\beta$ 3              | 128.1                                           | 36   | ASP     | H $\beta$ 2              | 131.3                                           |
| 5    | LEU     | H $\beta$ 2              | 130.8                                           | 36   | ASP     | H $\beta$ 3              | 125.3                                           |
| 5    | LEU     | H $\beta$ 3              | 126.4                                           | 37   | ASN     | H $\beta$ 2              | 128.9                                           |
| 6    | VAL     | H $\beta$                | 129.5 <sup>c</sup>                              | 37   | ASN     | H $\beta$ 3              | 134.7                                           |
| 7    | ILE     | H $\beta$                | 128.6 <sup>c</sup>                              | 39   | VAL     | H $\beta$                | 129.3 <sup>c</sup>                              |
| 8    | ASN     | H $\beta$ 2              | 129.9                                           | 40   | ASP     | H $\beta$ 2              | 129.0                                           |
| 8    | ASN     | H $\beta$ 3              | 130.1                                           | 40   | ASP     | H $\beta$ 3              | 130.1                                           |
| 10   | LYS     | H $\beta$ # <sup>d</sup> | 128.9                                           | 42   | VAL     | H $\beta$                | 129.4 <sup>c</sup>                              |
| 11   | THR     | H $\beta$                | 145.1                                           | 43   | TRP     | H $\beta$ 2              | 130.3                                           |
| 12   | LEU     | H $\beta$ 2              | 128.4                                           | 43   | TRP     | H $\beta$ 3              | 127.1                                           |
| 12   | LEU     | H $\beta$ 3              | 127.0                                           | 44   | THR     | H $\beta$                | 143.4                                           |
| 13   | LYS     | H $\beta$ 2              | 128.5                                           | 45   | TYR     | H $\beta$ 2              | 133.1                                           |
| 13   | LYS     | H $\beta$ 3              | 127.9                                           | 45   | TYR     | H $\beta$ 3              | 129.2                                           |
| 15   | GLU     | H $\beta$ 2 <sup>e</sup> | 130.3                                           | 46   | ASP     | H $\beta$ 2              | 130.0                                           |
| 15   | GLU     | H $\beta$ 3 <sup>e</sup> | 130.0                                           | 46   | ASP     | H $\beta$ 3              | 129.5                                           |
| 16   | THR     | H $\beta$                | 147.8                                           | 47   | ASP     | H $\beta$ 2              | 129.1                                           |
| 17   | THR     | H $\beta$                | 144.7                                           | 47   | ASP     | H $\beta$ 3              | 131.8                                           |
| 18   | THR     | H $\beta$                | 147.5 <sup>c</sup>                              | 49   | THR     | H $\beta$                | 148.0 <sup>c</sup>                              |
| 19   | LYS     | H $\beta$ # <sup>d</sup> | 130.4                                           | 50   | LYS     | H $\beta$ 2              | 130.7                                           |
| 21   | VAL     | H $\beta$                | 129.1 <sup>c</sup>                              | 50   | LYS     | H $\beta$ 3              | 131.4                                           |
| 22   | ASP     | H $\beta$ 2              | 126.1                                           | 51   | THR     | H $\beta$                | 146.9 <sup>c</sup>                              |
| 24   | GLU     | H $\beta$ 2              | 130.7                                           | 52   | PHE     | H $\beta$ 2              | 128.2                                           |
| 24   | GLU     | H $\beta$ 3              | 130.1                                           | 52   | PHE     | H $\beta$ 3              | 127.6                                           |
| 27   | GLU     | H $\beta$ 2              | 132.3                                           | 53   | THR     | H $\beta$                | 146.1 <sup>c</sup>                              |
| 27   | GLU     | H $\beta$ 3              | 131.2                                           | 54   | VAL     | H $\beta$                | 131.8                                           |
| 28   | LYS     | H $\beta$ # <sup>d</sup> | 128.4                                           | 55   | THR     | H $\beta$                | 145.2 <sup>c</sup>                              |
| 30   | PHE     | H $\beta$ 2              | 129.1                                           | 56   | GLU     | H $\beta$ 2              | 129.4                                           |
| 30   | PHE     | H $\beta$ 3              | 126.9                                           | 56   | GLU     | H $\beta$ 3              | 129.4                                           |

<sup>a</sup>  $^1J_{\text{C}\beta\text{H}\beta}$  for stereospecifically assigned proton.

<sup>b</sup>  $^1J_{\text{C}\beta\text{H}\beta}$  obtained from DEPT-filtered  $^1\text{H}$ - $^{13}\text{C}$  CT-HSQC by averaging the value from isotropic wild-type GB3 and three mutants (K4AK19EV42E-CHis<sub>6</sub>, K19AV42ED47K and K4AK19EV42E) unless indicated otherwise.

<sup>c</sup>  $^1J_{\text{C}\beta\text{H}\beta}$  is derived from the CT-HN(COCA)CB spectrum.

<sup>d</sup> # represents the two equivalent protons.

<sup>e</sup> ambiguous stereospecific assignment.



**Table S12. Detected sum of  $^1D_{\text{CBH}\beta 2}$  and  $^1D_{\text{CBH}\beta 3}$  for GB3 (Hz)**

| RES# | AA type | A <sup>a</sup>          |       | B                       |       | C                       |       | D                       |       | E                       |       | F                       |       |
|------|---------|-------------------------|-------|-------------------------|-------|-------------------------|-------|-------------------------|-------|-------------------------|-------|-------------------------|-------|
|      |         | $^1D_{\text{CBH}\beta}$ | error |
| 1    | MET     | 6.95                    | 0.69  |                         |       | 10.16                   | 0.52  |                         |       |                         |       |                         |       |
| 2    | GLN     | 3.81                    | 0.81  | 8.16                    | 0.37  | -5.26                   | 0.49  | -0.68                   | 0.63  | -2.58                   | 0.57  | 6.59                    | 0.54  |
| 3    | TYR     | 9.23                    | 1.02  |                         |       | -4.65                   | 0.54  | 5.21                    | 0.82  | -1.64                   | 0.54  | 14.83                   | 0.38  |
| 4    | LYS     |                         |       | 10.39                   | 0.75  |                         |       | 9.00                    | 0.87  | 0.52                    | 0.57  | 14.20                   | 0.53  |
| 5    | LEU     |                         |       | -29.15                  | 0.90  |                         |       | 5.43                    | 1.24  | 12.28                   | 0.74  | -13.93                  | 0.82  |
| 6    | VAL     |                         |       | -14.46                  | 0.43  | -5.07                   | 0.41  | 24.37                   | 0.47  | 16.02                   | 0.32  | -5.44                   | 0.27  |
| 7    | ILE     | -10.70                  | 0.65  | -15.86                  | 0.21  | 1.81                    | 0.48  | 17.56                   | 0.32  | 13.65                   | 0.24  | -5.39                   | 0.21  |
| 8    | ASN     |                         |       | 10.26                   | 0.30  | 6.67                    | 0.41  | -6.56                   | 0.52  | -3.68                   | 0.31  | 11.01                   | 0.30  |
| 10   | LYS     | -4.99                   | 1.40  | -16.65                  | 0.41  | 7.37                    | 0.87  | -11.94                  | 0.71  | 0.21                    | 0.44  | -20.44                  | 0.61  |
| 11   | THR     | -6.09                   | 0.33  | -16.05                  | 0.11  | -1.06                   | 0.16  | 13.32                   | 0.21  | 10.35                   | 0.13  | -6.71                   | 0.20  |
| 12   | LEU     | -17.62                  | 0.61  | 9.79                    | 0.35  | -20.11                  | 0.54  | 16.48                   | 0.36  | 5.74                    | 0.31  | -8.70                   | 0.25  |
| 13   | LYS     |                         |       | 14.31                   | 0.31  | -19.22                  | 0.42  | 9.41                    | 0.69  | 2.77                    | 0.42  | -7.63                   | 0.33  |
| 15   | GLU     |                         |       | -1.20                   | 0.22  |                         |       | -9.08                   | 0.66  | -1.82                   | 0.37  | 4.91                    | 0.29  |
| 16   | THR     | 11.12                   | 0.25  | 19.74                   | 0.12  | 4.11                    | 0.18  | -27.49                  | 0.33  | -15.36                  | 0.19  | -1.59                   | 0.10  |
| 17   | THR     | 6.92                    | 0.49  | 13.83                   | 0.17  |                         |       | -21.78                  | 0.39  | -11.39                  | 0.20  | -7.25                   | 0.20  |
| 18   | THR     | 18.84                   | 0.38  |                         |       | 3.98                    | 0.20  | -35.66                  | 0.76  | -23.11                  | 0.28  | 10.34                   | 0.16  |
| 19   | LYS     |                         |       |                         |       |                         |       | -7.66                   | 0.37  | -1.08                   | 0.31  | -26.79                  | 0.31  |
| 20   | ALA     | -17.09                  | 1.11  | -24.26                  | 0.70  | -3.24                   | 0.58  | 3.70                    | 2.24  | 10.70                   | 0.80  | -35.71                  | 0.59  |
| 21   | VAL     | -7.51                   | 0.17  | 8.94                    | 0.12  | -11.40                  | 0.12  | 4.47                    | 0.19  | 0.66                    | 0.14  | -4.62                   | 0.08  |
| 22   | ASP     | 23.00                   | 0.70  | 20.27                   | 0.30  | -0.13                   | 0.30  | -12.01                  | 0.38  | -12.10                  | 0.27  | 27.10                   | 0.29  |
| 23   | ALA     | 2.45                    | 0.78  | 24.57                   | 0.91  | 3.50                    | 0.37  | -18.34                  | 0.54  | -12.34                  | 0.36  | 7.27                    | 0.42  |
| 24   | GLU     | 10.96                   | 0.62  | 21.72                   | 0.39  | -2.19                   | 0.35  | -7.24                   | 0.58  | -9.12                   | 0.39  | 18.17                   | 0.29  |
| 26   | ALA     | 12.71                   | 2.03  | 8.40                    | 0.68  | 2.00                    | 0.74  | -10.15                  | 0.73  | -5.40                   | 0.49  | 13.65                   | 0.78  |
| 27   | GLU     | -6.11                   | 0.71  | -10.97                  | 0.73  | 5.78                    | 0.43  | -12.26                  | 0.58  | -2.60                   | 0.37  | -28.49                  | 0.36  |
| 28   | LYS     | -3.93                   | 0.62  | 28.01                   | 0.38  | -17.69                  | 0.52  | 7.69                    | 0.65  | -3.91                   | 0.40  | 18.36                   | 0.25  |
| 29   | ALA     | -6.04                   | 1.22  | -28.22                  | 0.68  | 2.63                    | 0.71  | 1.71                    | 0.69  | 9.69                    | 0.51  | -31.55                  | 0.57  |
| 30   | PHE     | 15.87                   | 1.14  | -7.99                   | 0.60  | 14.25                   | 0.63  | -18.45                  | 0.46  | -3.61                   | 0.34  | -4.55                   | 0.56  |
| 31   | LYS     | 21.04                   | 0.69  | 27.88                   | 0.67  | 8.40                    | 0.48  | -31.08                  | 0.63  | -21.81                  | 0.40  | 17.69                   | 0.36  |
| 32   | GLN     | -12.47                  | 0.77  | 15.91                   | 0.41  | -6.61                   | 0.50  | 4.50                    | 0.45  | -0.52                   | 0.36  | 2.69                    | 0.31  |
| 33   | TYR     | 13.84                   | 1.05  | -3.85                   | 0.36  | 0.73                    | 0.60  | -4.17                   | 0.41  | -2.04                   | 0.29  | 8.01                    | 0.41  |
| 34   | ALA     | 15.42                   | 1.16  | 17.47                   | 0.82  | 19.07                   | 0.63  | -24.68                  | 0.67  | -15.79                  | 0.40  | 12.61                   | 0.52  |
| 35   | ASN     | 11.17                   | 0.43  | 19.27                   | 0.25  | -5.53                   | 0.24  | -7.47                   | 0.44  | -9.43                   | 0.25  | 18.58                   | 0.17  |
| 36   | ASP     | -30.54                  | 0.75  | 2.95                    | 0.37  | -23.11                  | 0.37  | 22.51                   | 0.32  | 9.97                    | 0.27  | -20.43                  | 0.35  |
| 37   | ASN     | -0.36                   | 0.98  | -14.45                  | 0.49  | 6.93                    | 0.40  | -17.69                  | 0.30  | -0.85                   | 0.26  | -30.73                  | 0.64  |
| 39   | VAL     |                         |       | 2.24                    | 0.14  | 16.99                   | 0.27  | -25.33                  | 0.24  | -10.93                  | 0.15  | 7.33                    | 0.11  |
| 40   | ASP     |                         |       | -5.23                   | 0.10  | 7.74                    | 0.22  | -10.22                  | 0.20  | -2.19                   | 0.15  | -0.01                   | 0.13  |
| 42   | VAL     |                         |       |                         |       |                         |       | 0.86                    | 0.57  | 4.08                    | 0.29  | -11.41                  | 0.24  |
| 43   | TRP     |                         |       |                         |       | -2.84                   | 1.57  | -5.02                   | 1.93  | -6.24                   | 1.43  | 28.71                   | 1.24  |
| 44   | THR     | -9.35                   | 0.38  | 24.59                   | 0.19  | -15.64                  | 0.28  | -4.26                   | 0.46  | -7.15                   | 0.24  | -5.77                   | 0.20  |
| 45   | TYR     | -33.92                  | 0.79  | -9.67                   | 0.43  | -25.75                  | 0.44  | 37.23                   | 0.56  | 18.72                   | 0.45  | -21.10                  | 0.32  |
| 46   | ASP     | 16.30                   | 0.73  |                         |       | -0.73                   | 0.38  | -0.22                   | 1.19  | -3.44                   | 0.42  | 29.04                   | 0.28  |
| 47   | ASP     | -10.02                  | 0.33  |                         |       | -5.56                   | 0.16  | 19.37                   | 0.20  | 7.45                    | 0.16  | 3.82                    | 0.23  |
| 48   | ALA     | -1.92                   | 1.18  |                         |       | -7.96                   | 0.79  | -4.92                   | 1.17  | -7.25                   | 0.82  | 12.08                   | 0.76  |
| 49   | THR     | -15.61                  | 0.33  | -16.38                  | 0.25  | -11.85                  | 0.23  | 25.81                   | 0.28  | 16.56                   | 0.20  | -11.26                  | 0.14  |
| 50   | LYS     | -22.94                  | 1.16  |                         |       | -0.75                   | 0.71  | 30.25                   | 0.93  | 23.65                   | 0.75  | -27.94                  | 0.40  |
| 51   | THR     | -11.21                  | 0.87  |                         |       | -11.90                  | 0.60  | 25.46                   | 0.61  | 15.58                   | 0.47  | -11.20                  | 0.49  |
| 52   | PHE     |                         |       | 24.06                   | 0.57  | -15.80                  | 0.64  | 16.84                   | 0.90  | 1.24                    | 0.51  | 28.92                   | 0.48  |
| 53   | THR     | -11.93                  | 0.65  | -13.47                  | 0.38  | -8.38                   | 0.44  | 20.51                   | 0.43  | 13.34                   | 0.33  | -5.15                   | 0.28  |
| 54   | VAL     |                         |       | 6.61                    | 0.26  | 18.93                   | 0.78  | -25.52                  | 0.42  | -11.82                  | 0.31  | -2.43                   | 0.27  |
| 55   | THR     |                         |       | -15.06                  | 0.37  | 0.08                    | 0.35  | 16.21                   | 0.43  | 13.21                   | 0.31  | -6.27                   | 0.24  |

<sup>a</sup> A-C represent mutant 1 (K4A/K19E/V42E-CHis<sub>6</sub>), mutant 2 (K19A/V42E/D47K), and mutant 3 (K4A/K19E/V42E) in Pfl, and D-F represent wild type GB3 in bicelles, PEG, and Pfl, respectively. The sum of  $^1D_{\text{CBH}\beta 2}$  and  $^1D_{\text{CBH}\beta 3}$  was measured from CT-HN(COCA)CB spectra.

**Table S13. Detected individual  $^1D_{\text{C}\beta\text{H}\beta 2}$  and  $^1D_{\text{C}\beta\text{H}\beta 3}$  values for GB3 (Hz)**

| RES# | AA type | $\beta$ proton           | A <sup>a</sup>                       |                                      | B                                    |                                      | C                                    |                                      | D                                    |                                      | E                                    |                                      | F                                    |                                      |
|------|---------|--------------------------|--------------------------------------|--------------------------------------|--------------------------------------|--------------------------------------|--------------------------------------|--------------------------------------|--------------------------------------|--------------------------------------|--------------------------------------|--------------------------------------|--------------------------------------|--------------------------------------|
|      |         |                          | $^1D_{\text{C}\beta\text{H}\beta}^b$ | $^1D_{\text{C}\beta\text{H}\beta}^c$ |
| 1    | MET     | H $\beta$ 2              | 2.0                                  | 2.4                                  | 7.7                                  | 11.6                                 | 3.4                                  | 3.3                                  | -10.4                                | -14.0                                |                                      |                                      | -0.3                                 | -0.3                                 |
| 1    | MET     | H $\beta$ 3              | 2.5                                  | 3.0                                  | -2.0                                 | -3.1                                 | 3.7                                  | 3.6                                  | -5.3                                 | -7.1                                 | -3.6                                 | -4.0                                 | 2.8                                  | 2.7                                  |
| 2    | GLN     | H $\beta$ 2              |                                      |                                      |                                      |                                      | -6.8                                 | -6.6                                 | 1.9                                  | 2.5                                  | -1.8                                 | -2.0                                 | 18.2                                 | 17.6                                 |
| 2    | GLN     | H $\beta$ 3              |                                      |                                      |                                      |                                      | -0.2                                 | -0.2                                 | -0.8                                 | -1.0                                 | 0.4                                  | 0.5                                  | -11.5                                | -11.1                                |
| 3    | TYR     | H $\beta$ 2              | -12.9                                | -15.5                                |                                      |                                      | -14.4                                | -14.0                                |                                      |                                      |                                      | 0.0                                  |                                      |                                      |
| 3    | TYR     | H $\beta$ 3              | 22.2                                 | 26.6                                 |                                      |                                      | 8.6                                  | 8.4                                  | -7.9                                 | -10.6                                | -9.5                                 | -10.5                                | 35.5                                 | 34.3                                 |
| 4    | LYS     | H $\beta$ 2              |                                      |                                      | 11.8                                 | 17.7                                 |                                      |                                      | 3.1                                  | 4.2                                  | -3.9                                 | -4.3                                 | 20.1                                 | 19.4                                 |
| 4    | LYS     | H $\beta$ 3              |                                      |                                      | -1.4                                 | -2.0                                 |                                      |                                      | 4.6                                  | 6.2                                  | 4.1                                  | 4.5                                  | -6.3                                 | -6.1                                 |
| 5    | LEU     | H $\beta$ 2              |                                      |                                      | -9.7                                 | -14.6                                |                                      |                                      |                                      |                                      | -6.1                                 | -6.8                                 | -12.2                                | -11.8                                |
| 5    | LEU     | H $\beta$ 3              |                                      |                                      | -9.1                                 | -13.6                                |                                      |                                      |                                      |                                      | 16.0                                 | 17.7                                 | -0.6                                 | -0.6                                 |
| 6    | VAL     | H $\beta$                |                                      |                                      |                                      |                                      | -3.0                                 | -2.9                                 |                                      |                                      |                                      |                                      |                                      |                                      |
| 7    | ILE     | H $\beta$                | -7.5                                 | -9.0                                 | -9.7                                 | -14.6                                | 4.7                                  | 4.6                                  |                                      |                                      |                                      |                                      |                                      |                                      |
| 8    | ASN     | H $\beta$ 2              |                                      |                                      | 12.2                                 | 18.4                                 | -1.7                                 | -1.6                                 | 3.1                                  | 4.2                                  | -4.5                                 | -4.9                                 | 9.5                                  | 9.2                                  |
| 8    | ASN     | H $\beta$ 3              |                                      |                                      | -5.4                                 | -8.2                                 | 9.5                                  | 9.2                                  | 3.9                                  | 5.2                                  | 1.8                                  | 1.9                                  | 2.2                                  | 2.1                                  |
| 11   | THR     | H $\beta$                | -4.1                                 | -4.9                                 | -7.7                                 | -11.6                                | 0.9                                  | 0.9                                  | 12.2                                 | 16.4                                 | 8.6                                  | 9.5                                  | -6.5                                 | -6.2                                 |
| 12   | LEU     | H $\beta$ 2              | -7.5                                 | -8.9                                 | 11.1                                 | 16.7                                 | -16.8                                | -16.3                                | 1.0                                  | 1.3                                  | -1.5                                 | -1.6                                 | -8.5                                 | -8.2                                 |
| 12   | LEU     | H $\beta$ 3              | -4.1                                 | -4.9                                 | -3.4                                 | -5.1                                 | -2.7                                 | -2.6                                 | 11.4                                 | 15.3                                 | 6.7                                  | 7.5                                  | -1.9                                 | -1.9                                 |
| 13   | LYS     | H $\beta$ 2              |                                      |                                      | -3.9                                 | -5.8                                 | -4.3                                 | -4.1                                 | 9.2                                  | 12.3                                 | 7.2                                  | 8.0                                  | -5.3                                 | -5.1                                 |
| 13   | LYS     | H $\beta$ 3              |                                      |                                      | 13.6                                 | 20.4                                 | -15.3                                | -14.9                                | -3.1                                 | -4.2                                 | -3.5                                 | -3.9                                 | -2.9                                 | -2.8                                 |
| 15   | GLU     | H $\beta$ 2 <sup>d</sup> |                                      |                                      | -0.7                                 | -1.0                                 |                                      |                                      | -1.6                                 | -2.1                                 | 1.5                                  | 1.7                                  | 1.1                                  | 1.1                                  |
| 15   | GLU     | H $\beta$ 3 <sup>d</sup> |                                      |                                      | 1.6                                  | 2.4                                  |                                      |                                      | -5.5                                 | -7.3                                 | -2.0                                 | -2.2                                 | 3.3                                  | 3.2                                  |
| 16   | THR     | H $\beta$                | 7.3                                  | 8.7                                  | 12.0                                 | 18.1                                 | 2.3                                  | 2.2                                  | -20.6                                | -27.7                                | -12.5                                | -13.9                                | -2.2                                 | -2.2                                 |
| 17   | THR     | H $\beta$                | 4.3                                  | 5.1                                  | 9.5                                  | 14.3                                 |                                      |                                      | -17.6                                | -23.7                                | -10.3                                | -11.4                                | -8.2                                 | -7.9                                 |
| 18   | THR     | H $\beta$                | 15.2                                 | 18.2                                 |                                      |                                      | 0.4                                  | 0.4                                  |                                      |                                      |                                      |                                      | 8.9                                  | 8.6                                  |
| 21   | VAL     | H $\beta$                | -5.7                                 | -6.8                                 |                                      |                                      | -12.5                                | -12.1                                |                                      |                                      |                                      |                                      |                                      |                                      |
| 22   | ASN     | H $\beta$ 2              | 0.2                                  | 0.3                                  |                                      |                                      | -4.8                                 | -4.7                                 | 15.8                                 | 21.3                                 | 10.5                                 | 11.6                                 | 3.9                                  | 3.7                                  |
| 24   | GLU     | H $\beta$ 2              | 4.1                                  | 4.9                                  | 8.2                                  | 12.3                                 | -2.8                                 | -2.8                                 | -2.4                                 | -3.2                                 | -3.2                                 | -3.6                                 | 8.1                                  | 7.9                                  |
| 24   | GLU     | H $\beta$ 3              | 3.4                                  | 4.1                                  | 7.0                                  | 10.5                                 | -2.0                                 | -1.9                                 | -3.0                                 | -4.0                                 | -4.8                                 | -5.3                                 | 9.5                                  | 9.1                                  |
| 27   | GLU     | H $\beta$ 2              | -10.9                                | -13.0                                | 6.4                                  | 9.6                                  | -17.9                                | -17.3                                | 3.8                                  | 5.0                                  | -0.6                                 | -0.7                                 | -17.1                                | -16.6                                |
| 27   | GLU     | H $\beta$ 3              |                                      |                                      |                                      |                                      |                                      |                                      | -12.1                                | -16.2                                | -0.4                                 | -0.4                                 |                                      |                                      |
| 30   | PHE     | H $\beta$ 2              | -11.1                                | -13.3                                | -9.1                                 | -13.6                                | -3.9                                 | -3.8                                 | 11.5                                 | 15.4                                 | 11.9                                 | 13.2                                 | -16.1                                | -15.6                                |
| 30   | PHE     | H $\beta$ 3              | 21.3                                 | 25.5                                 | 3.0                                  | 4.4                                  | 19.1                                 | 18.5                                 | -20.8                                | -28.0                                | -14.6                                | -16.1                                | 12.7                                 | 12.2                                 |
| 31   | LYS     | H $\beta$ 2              | 16.5                                 | 19.8                                 | 1.1                                  | 1.7                                  | 12.9                                 | 12.5                                 | -15.4                                | -20.7                                | -9.8                                 | -10.9                                | 4.8                                  | 4.6                                  |
| 31   | LYS     | H $\beta$ 3              | -0.7                                 | -0.8                                 | 17.4                                 | 26.2                                 | -7.0                                 | -6.8                                 | -4.8                                 | -6.4                                 | -8.9                                 | -9.8                                 | 13.2                                 | 12.7                                 |
| 33   | TYR     | H $\beta$ 2              | 22.6                                 | 27.1                                 | 9.5                                  | 14.3                                 |                                      |                                      |                                      |                                      |                                      |                                      | 24.1                                 | 23.2                                 |
| 33   | TYR     | H $\beta$ 3              | -10.9                                | -13.0                                | -7.9                                 | -11.9                                |                                      |                                      |                                      |                                      |                                      |                                      | -15.7                                | -15.1                                |
| 35   | ASN     | H $\beta$ 2              | 3.4                                  | 4.1                                  | 5.7                                  | 8.5                                  | -5.0                                 | -4.9                                 | -1.4                                 | -1.9                                 | -2.4                                 | -2.6                                 | 5.6                                  | 5.4                                  |
| 35   | ASN     | H $\beta$ 3              | 4.3                                  | 5.1                                  | 9.5                                  | 14.3                                 | -3.2                                 | -3.1                                 | -3.2                                 | -4.3                                 | -5.3                                 | -5.9                                 | 12.0                                 | 11.6                                 |
| 36   | ASP     | H $\beta$ 2              | -10.2                                | -12.2                                | 8.8                                  | 13.3                                 | -13.4                                | -13.1                                | 0.4                                  | 0.6                                  | -2.9                                 | -3.2                                 | -7.3                                 | -7.1                                 |
| 36   | ASP     | H $\beta$ 3              | -12.0                                | -14.4                                | -6.6                                 | -9.9                                 | -9.8                                 | -9.5                                 | 14.8                                 | 19.9                                 | 13.3                                 | 14.7                                 | -14.4                                | -13.9                                |
| 37   | ASN     | H $\beta$ 2              | -12.9                                | -15.5                                | 3.2                                  | 4.8                                  | -16.9                                | -16.4                                | 2.4                                  | 3.2                                  | 3.8                                  | 4.2                                  | -22.4                                | -21.6                                |
| 37   | ASN     | H $\beta$ 3              | 10.6                                 | 12.7                                 | -14.9                                | -22.5                                | 23.4                                 | 22.7                                 | -15.9                                | -21.3                                | -3.7                                 | -4.1                                 | -9.8                                 | -9.4                                 |
| 39   | VAL     | H $\beta$                |                                      |                                      |                                      |                                      | 15.8                                 | 15.3                                 |                                      | 0.0                                  |                                      |                                      |                                      |                                      |
| 40   | ASP     | H $\beta$ 2              |                                      |                                      | -12.5                                | -18.7                                | -4.1                                 | -4.0                                 | 10.1                                 | 13.6                                 | 8.5                                  | 9.4                                  | -11.8                                | -11.4                                |
| 40   | ASP     | H $\beta$ 3              |                                      |                                      | 9.5                                  | 14.3                                 | 10.0                                 | 9.7                                  | -16.3                                | -21.9                                | -11.4                                | -12.6                                | 12.1                                 | 11.7                                 |
| 43   | TRP     | H $\beta$ 2              |                                      |                                      |                                      |                                      |                                      |                                      |                                      |                                      | 14.5                                 | 16.1                                 | -1.7                                 | -1.7                                 |
| 43   | TRP     | H $\beta$ 3              |                                      |                                      |                                      |                                      | -3.6                                 | -3.5                                 |                                      |                                      | -19.3                                | -21.4                                | 30.7                                 | 29.7                                 |
| 44   | THR     | H $\beta$                | -5.2                                 | -6.2                                 | 16.5                                 | 24.9                                 | -17.3                                | -16.8                                | -4.7                                 | -6.4                                 | -5.2                                 | -5.8                                 | -7.7                                 | -7.5                                 |
| 45   | TYR     | H $\beta$ 2              | -16.1                                | -19.2                                |                                      |                                      | -19.7                                | -19.1                                | 4.7                                  | 6.3                                  | 2.1                                  | 2.3                                  | -5.4                                 | -5.2                                 |
| 45   | TYR     | H $\beta$ 3              |                                      |                                      | -9.3                                 | -14.0                                |                                      |                                      | 20.2                                 | 27.2                                 |                                      |                                      |                                      |                                      |
| 46   | ASP     | H $\beta$ 2              | 22.4                                 | 26.8                                 |                                      |                                      | 8.4                                  | 8.1                                  | -17.2                                | -23.1                                | -17.2                                | -19.1                                | 30.8                                 | 29.8                                 |
| 46   | ASP     | H $\beta$ 3              | -8.8                                 | -10.6                                |                                      |                                      | -9.0                                 | -8.7                                 | 15.0                                 | 20.2                                 | 13.7                                 | 15.1                                 | -2.8                                 | -2.8                                 |
| 47   | ASP     | H $\beta$ 2              | -0.7                                 | -0.8                                 |                                      |                                      | 0.6                                  | 0.6                                  | 6.1                                  | 8.2                                  | -0.8                                 | -0.9                                 | 13.8                                 | 13.3                                 |
| 47   | ASP     | H $\beta$ 3              | -6.8                                 | -8.1                                 |                                      |                                      | -7.3                                 | -7.1                                 | 10.1                                 | 13.6                                 | 5.7                                  | 6.3                                  | -11.4                                | -11.0                                |

|    |     |             |       |       |       |       |       |       |      |       |       |       |       |       |
|----|-----|-------------|-------|-------|-------|-------|-------|-------|------|-------|-------|-------|-------|-------|
| 49 | THR | H $\beta$   | -10.9 | -13.0 | -9.3  | -13.9 | -9.6  | -9.3  | 14.7 | 19.8  | 14.7  | 16.2  | -11.4 | -11.0 |
| 50 | LYS | H $\beta$ 2 | -11.6 | -13.8 |       |       | 5.7   | 5.5   | 13.6 | 18.3  | 12.1  | 13.4  | -7.4  | -7.1  |
| 50 | LYS | H $\beta$ 3 | -7.9  | -9.5  |       |       | -4.5  | -4.3  |      |       | 7.8   | 8.7   | -20.0 | -19.3 |
| 51 | THR | H $\beta$   | -7.9  | -9.5  |       |       | -11.7 | -11.4 | 18.8 | 25.3  | 14.1  | 15.6  | -11.5 | -11.1 |
| 52 | PHE | H $\beta$ 2 |       |       | -8.4  | -12.6 | -9.5  | -9.2  | 20.1 | 27.0  | 15.6  | 17.3  | -3.4  | -3.3  |
| 52 | PHE | H $\beta$ 3 |       |       | 29.4  | 44.3  | -5.7  | -5.5  | -8.6 | -11.5 | -15.0 | -16.6 | 32.3  | 31.2  |
| 53 | THR | H $\beta$   |       |       |       |       | -5.6  | -5.5  |      |       |       |       | -4.5  | -4.4  |
| 54 | VAL | H $\beta$   |       |       | 3.6   | 5.4   | 13.1  | 12.7  |      |       | -8.4  | -9.3  | -2.6  | -2.5  |
| 55 | THR | H $\beta$   |       |       | -11.0 | -16.6 | 2.1   | 2.1   |      |       |       |       |       |       |
| 56 | GLU | H $\beta$ 2 |       |       | -6.3  | -9.5  | 12.2  | 11.9  | 0.3  | 0.4   | 1.6   | 1.8   | 4.9   | 4.7   |
| 56 | GLU | H $\beta$ 3 |       |       | 8.8   | 13.3  | 3.2   | 3.1   | -8.3 | -11.1 |       |       | 10.2  | 9.9   |

<sup>a</sup> A-C represent mutant 1 (K4A/K19E/V42E-CHis<sub>6</sub>), mutant 2 (K19A/V42E/D47K), and mutant 3 (K4A/K19E/V42E) in Pf1, and D-F represent wild type GB3 in bicelles, PEG, and Pf1, respectively.

<sup>b</sup> The individual <sup>1</sup>D<sub>C $\beta$ H $\beta$ 2</sub> and <sup>1</sup>D<sub>C $\beta$ H $\beta$ 3</sub> were measured from DEPT-filtered <sup>1</sup>H-<sup>13</sup>C CT-HSQC spectra.

<sup>c</sup> The individual <sup>1</sup>D<sub>C $\beta$ H $\beta$ 2</sub> and <sup>1</sup>D<sub>C $\beta$ H $\beta$ 3</sub> were scaled to the alignment strength of the sample used for the <sup>1</sup>D<sub>C $\beta$ -H $\beta$</sub>  measurement from the CT-HN(COCA)CB spectrum.

<sup>d</sup> Ambiguous stereospecific assignment.

**Table S14. Experimental  $^1D_{C\beta C\gamma}$  values for GB3 (Hz)**

| RES# | AA type | $\gamma$ carbon | A <sup>a</sup>           |                          |                          | B                        |                          |                          | C                        |                          |                          | D                        |                          |                          | E                        |                          |                          | F                        |                          |                          |      |     |      |      |      |      |
|------|---------|-----------------|--------------------------|--------------------------|--------------------------|--------------------------|--------------------------|--------------------------|--------------------------|--------------------------|--------------------------|--------------------------|--------------------------|--------------------------|--------------------------|--------------------------|--------------------------|--------------------------|--------------------------|--------------------------|------|-----|------|------|------|------|
|      |         |                 | $^1D_{C\beta C\gamma}^b$ | $^1D_{C\beta C\gamma}^c$ | $^1D_{C\beta C\gamma}^d$ | $^1D_{C\beta C\gamma}^b$ | $^1D_{C\beta C\gamma}^c$ | $^1D_{C\beta C\gamma}^d$ | $^1D_{C\beta C\gamma}^b$ | $^1D_{C\beta C\gamma}^c$ | $^1D_{C\beta C\gamma}^d$ | $^1D_{C\beta C\gamma}^b$ | $^1D_{C\beta C\gamma}^c$ | $^1D_{C\beta C\gamma}^d$ | $^1D_{C\beta C\gamma}^b$ | $^1D_{C\beta C\gamma}^c$ | $^1D_{C\beta C\gamma}^d$ | $^1D_{C\beta C\gamma}^b$ | $^1D_{C\beta C\gamma}^c$ | $^1D_{C\beta C\gamma}^d$ |      |     |      |      |      |      |
| 3    | TYR     | C $\gamma$      | 0.2                      |                          | 0.2                      |                          |                          | 0.0                      |                          | 0.0                      |                          |                          | -1.5                     |                          | -2.6                     |                          | -0.8                     |                          | -0.9                     |                          | -1.6 |     |      | 0.0  |      | 0.0  |
| 6    | VAL     | C $\gamma$ 1    |                          |                          |                          |                          | 0.0                      | 0.0                      |                          |                          |                          |                          |                          |                          |                          |                          | -1.2                     | -1.2                     |                          |                          |      |     |      | 2.5  | 2.6  |      |
| 6    | VAL     | C $\gamma$ 2    |                          |                          |                          |                          | 2.9                      | 3.9                      |                          |                          |                          |                          |                          |                          |                          |                          | -1.2                     | -1.3                     |                          |                          |      |     |      | 2.3  | 2.4  |      |
| 7    | ILE     | C $\gamma$ 2    |                          | 0.7                      | 0.7                      |                          | 3.2                      | 4.2                      |                          | -0.9                     | -0.9                     |                          |                          | -0.8                     | -1.4                     |                          | -1.6                     | -1.7                     |                          |                          |      |     |      | 0.4  |      | 0.5  |
| 8    | ASN     | C $\gamma$      |                          |                          |                          |                          |                          |                          |                          | 0.9                      | 0.9                      |                          |                          |                          |                          |                          | -0.7                     |                          |                          | -0.8                     |      | 0.4 |      |      |      |      |
| 11   | THR     | C $\gamma$ 2    |                          | 1.2                      | 1.1                      |                          | 1.4                      | 1.8                      |                          | 0.2                      | 0.2                      |                          |                          | -0.3                     | -0.5                     |                          | -0.5                     | -0.5                     |                          |                          |      |     |      | 1.8  | 1.9  |      |
| 16   | THR     | C $\gamma$ 2    |                          | -0.7                     | -0.6                     |                          | -0.4                     | -0.6                     |                          | 0.2                      | 0.2                      |                          |                          | 0.8                      | 1.4                      |                          | 1.0                      | 1.1                      |                          |                          |      |     |      | 0.0  | 0.0  |      |
| 17   | THR     | C $\gamma$ 2    |                          | 0.0                      | 0.0                      |                          | -1.8                     | -2.4                     |                          |                          |                          |                          |                          | -0.1                     | -0.1                     |                          | 0.6                      | 0.6                      |                          |                          |      |     |      | -1.1 | -1.2 |      |
| 18   | THR     | C $\gamma$ 2    |                          | -1.4                     | -1.3                     |                          |                          |                          |                          | -1.0                     | -1.0                     |                          |                          | 0.8                      | 1.5                      |                          | 1.4                      | 1.5                      |                          |                          |      |     |      | -1.1 | -1.2 |      |
| 21   | VAL     | C $\gamma$ 1    |                          | 0.0                      | 0.0                      |                          |                          |                          |                          |                          |                          |                          |                          |                          |                          |                          | 0.2                      | 0.3                      |                          |                          |      |     |      | 1.1  | 1.2  |      |
| 21   | VAL     | C $\gamma$ 2    |                          | -0.1                     | -0.1                     |                          | 1.4                      | 1.8                      |                          | -0.5                     | -0.5                     |                          |                          | -0.1                     | -0.1                     |                          | -0.4                     | -0.4                     |                          |                          |      |     |      | 0.7  | 0.7  |      |
| 22   | ASP     | C $\gamma$      | -1.6                     |                          | -1.5                     | -0.2                     |                          | -0.3                     | -0.5                     |                          |                          |                          |                          |                          |                          | 0.1                      |                          | 0.2                      |                          |                          |      |     | -0.9 |      |      | -0.9 |
| 25   | THR     | C $\gamma$ 2    |                          | -1.5                     | -1.3                     |                          |                          |                          |                          |                          |                          |                          |                          |                          |                          |                          |                          |                          |                          |                          |      |     |      | 0.0  | 0.0  |      |
| 30   | PHE     | C $\gamma$      | 0.4                      |                          | 0.3                      | 1.8                      |                          | 2.3                      | -0.4                     |                          | -0.4                     | 0.0                      |                          |                          | 0.0                      | -0.6                     |                          | -0.6                     |                          |                          |      |     | 2.4  |      | 2.5  |      |
| 33   | TYR     | C $\gamma$      | -0.6                     |                          | -0.6                     | -1.7                     |                          | -2.2                     | 1.4                      |                          | 1.3                      | 0.1                      |                          |                          | 0.2                      | 0.6                      |                          | 0.6                      |                          |                          |      |     | -1.7 |      | -1.8 |      |
| 35   | ASN     | C $\gamma$      | -1.1                     |                          | -1.0                     | 0.0                      |                          | 0.0                      | -1.1                     |                          | -1.0                     | 0.9                      |                          |                          | 1.7                      | 0.5                      |                          | 0.6                      |                          |                          |      |     | -0.1 |      | -0.1 |      |
| 36   | ASP     | C $\gamma$      | 1.1                      |                          | 1.0                      | -1.7                     |                          | -2.3                     | 2.2                      |                          | 2.1                      | -0.9                     |                          |                          | -1.7                     | 0.0                      |                          | 0.0                      |                          |                          |      |     | -1.4 |      | -1.4 |      |
| 37   | ASN     | C $\gamma$      | 1.1                      |                          | 1.0                      | -0.1                     |                          | -0.1                     | 0.4                      |                          | 0.4                      | 0.5                      |                          |                          | 0.9                      | 0.6                      |                          | 0.6                      |                          |                          |      |     | 2.9  |      | 3.1  |      |
| 39   | VAL     | C $\gamma$ 1    |                          |                          |                          |                          | -1.4                     | -1.8                     |                          | -1.3                     | -1.3                     |                          |                          | 0.6                      | 1.1                      |                          | 0.8                      | 0.8                      |                          |                          |      |     |      | -1.6 | -1.7 |      |
| 39   | VAL     | C $\gamma$ 2    |                          |                          |                          |                          | -0.9                     | -1.2                     |                          | 0.6                      | 0.6                      |                          |                          | 0.6                      | 1.0                      |                          | 1.0                      | 1.0                      |                          |                          |      |     |      | -0.9 | -0.9 |      |
| 40   | ASP     | C $\gamma$      |                          |                          |                          | -0.8                     |                          | -1.1                     | -0.1                     |                          | -0.1                     | 0.5                      |                          |                          | 0.9                      | 0.8                      |                          | 0.8                      |                          |                          |      |     | -0.9 |      | -1.0 |      |
| 42   | VAL     | C $\gamma$ 1    |                          |                          |                          |                          |                          |                          |                          |                          |                          |                          |                          | -0.6                     | -1.0                     |                          | -0.5                     | -0.5                     |                          |                          |      |     |      | -1.4 | -1.4 |      |
| 42   | VAL     | C $\gamma$ 2    |                          |                          |                          |                          |                          |                          |                          |                          |                          |                          |                          | -0.3                     | -0.6                     |                          | -1.0                     | -1.0                     |                          |                          |      |     |      | 2.3  | 2.4  |      |
| 43   | TRP     | C $\gamma$      |                          |                          |                          |                          |                          |                          | -2.3                     |                          | -2.2                     | 0.9                      |                          |                          | 1.7                      | 0.9                      |                          | 0.9                      |                          |                          |      |     |      | -2.1 |      | -2.2 |
| 44   | THR     | C $\gamma$ 2    |                          | 1.3                      | 1.2                      |                          | 1.4                      | 1.8                      |                          | 0.2                      | 0.2                      |                          |                          | 0.0                      | 0.0                      |                          | -0.6                     | -0.6                     |                          |                          |      |     |      | 2.7  | 2.8  |      |
| 45   | TYR     | C $\gamma$      | 3.1                      |                          | 2.8                      | 2.8                      |                          | 3.7                      | -0.3                     |                          | -0.3                     |                          |                          |                          |                          | -1.4                     |                          | -1.5                     |                          |                          |      |     | 3.8  |      | 4.0  |      |
| 46   | ASP     | C $\gamma$      | -1.6                     |                          | -1.5                     |                          |                          |                          | -2.2                     |                          | -2.1                     | 0.0                      |                          |                          | 0.0                      | 0.0                      |                          | 0.0                      |                          |                          |      |     |      | -1.1 |      | -1.2 |
| 47   | ASP     | C $\gamma$      | 2.0                      |                          | 1.8                      |                          |                          |                          | 0.6                      |                          | 0.6                      | -0.8                     |                          |                          | -1.4                     | -1.3                     |                          | -1.4                     |                          |                          |      |     | 1.4  |      | 1.4  |      |
| 49   | THR     | C $\gamma$ 2    |                          | -1.1                     | -1.1                     |                          | -1.8                     | -2.4                     |                          | -0.3                     | -0.3                     |                          |                          |                          |                          |                          | 0.8                      | 0.9                      |                          |                          |      |     |      | -2.0 | -2.1 |      |
| 52   | PHE     | C $\gamma$      | 1.4                      |                          |                          | -1.1                     |                          | -1.4                     | 1.6                      |                          | 1.6                      | -0.8                     |                          |                          | -1.4                     | -0.6                     |                          | -0.6                     |                          |                          |      |     | -0.9 |      | -0.9 |      |
| 53   | THR     | C $\gamma$ 2    |                          | 1.7                      | 1.5                      |                          | 1.6                      | 2.1                      |                          | 0.8                      | 0.8                      |                          |                          | -1.4                     | -2.6                     |                          | -1.6                     | -1.6                     |                          |                          |      |     |      | 0.0  | 0.0  |      |
| 54   | VAL     | C $\gamma$ 1    |                          |                          |                          |                          | -0.7                     | -0.9                     |                          | -0.9                     | -0.9                     |                          |                          | 0.9                      | 1.7                      |                          | 1.2                      | 1.3                      |                          |                          |      |     |      | -0.2 | -0.2 |      |
| 54   | VAL     | C $\gamma$ 2    |                          |                          |                          |                          | 2.5                      | 3.3                      |                          | -0.3                     | -0.3                     |                          |                          | -0.5                     | -1.0                     |                          | -1.0                     | -1.0                     |                          |                          |      |     |      | 2.0  | 2.1  |      |
| 55   | THR     | C $\gamma$ 2    |                          |                          |                          |                          |                          |                          |                          |                          |                          |                          |                          |                          |                          |                          |                          |                          |                          |                          |      |     |      | 0.0  | 0.0  |      |

<sup>a</sup> A-C represent mutant 1 (K4A/K19E/V42E-CHis<sub>6</sub>), mutant 2 (K19A/V42E/D47K), and mutant 3 (K4A/K19E/V42E) in Pfl, and D-F represent wild type GB3 in bicelle, PEG, and Pfl, respectively.

<sup>b</sup>  $^1D_{C\beta C\gamma}$  was measured from a 900 MHz CT  $^1H$ - $^{13}C$  HSQC spectrum that left  $^{13}C^{\beta}$ - $^{13}C^{\gamma}$  dipolar and J coupling evolution intact.

<sup>c</sup>  $^1D_{C\beta C\gamma}$  was measured from a 900 MHz real-time  $^1H$ - $^{13}C$  HSQC spectrum optimized for methyl  $^{13}C$  evolution.

<sup>d</sup>  $^1D_{C\beta C\gamma}$  was scaled to the alignment strength of the sample used for the  $^1D_{C\beta H\beta}$  measurement, as measured from the CT-HN(COCA)CB spectrum.

**Table S15.  $X$  values based on VW-Fit results**

| Res# | AA type | $X^a$                                                                                       |                                                                                             | Number of RDCs <sup>b</sup> | Res# | AA type | $X^a$                                                                                       |                                                                                             | Number of RDCs <sup>b</sup> |
|------|---------|---------------------------------------------------------------------------------------------|---------------------------------------------------------------------------------------------|-----------------------------|------|---------|---------------------------------------------------------------------------------------------|---------------------------------------------------------------------------------------------|-----------------------------|
|      |         | $\frac{\delta H^{\beta 2} > \delta H^{\beta 3}}{\delta C^{\gamma 1} > \delta C^{\gamma 2}}$ | $\frac{\delta H^{\beta 3} > \delta H^{\beta 2}}{\delta C^{\gamma 2} > \delta C^{\gamma 1}}$ |                             |      |         | $\frac{\delta H^{\beta 2} > \delta H^{\beta 3}}{\delta C^{\gamma 1} > \delta C^{\gamma 2}}$ | $\frac{\delta H^{\beta 3} > \delta H^{\beta 2}}{\delta C^{\gamma 2} > \delta C^{\gamma 1}}$ |                             |
| 1    | MET     | 2.45                                                                                        | 1.73                                                                                        | 11                          | 31   | LYS     | 8.34                                                                                        | 0.97                                                                                        | 12                          |
| 2    | GLN     | 2.02                                                                                        | 3.84                                                                                        | 10                          | 32   | GLN     | 0.70                                                                                        | 0.70                                                                                        | 6                           |
| 3    | TYR     | 0.86                                                                                        | 7.84                                                                                        | 15                          | 33   | TYR     | 1.36                                                                                        | 5.89                                                                                        | 15                          |
| 4    | LYS     | 1.06                                                                                        | 7.05                                                                                        | 8                           | 35   | ASN     | 1.47                                                                                        | 1.07                                                                                        | 18                          |
| 5    | LEU     | 1.51                                                                                        | 10.09                                                                                       | 7                           | 36   | ASP     | 5.71                                                                                        | 1.37                                                                                        | 18                          |
| 6    | VAL     | 7.34                                                                                        | 1.19                                                                                        | 11                          | 37   | ASN     | 1.01                                                                                        | 12.45                                                                                       | 18                          |
| 7    | ILE     | 0.81                                                                                        |                                                                                             | 12                          | 39   | VAL     | 2.18                                                                                        | 1.35                                                                                        | 15                          |
| 8    | ASN     | 0.61                                                                                        | 4.85                                                                                        | 13                          | 40   | ASP     | 1.99                                                                                        | 2.53                                                                                        | 15                          |
| 10   | LYS     | 1.60                                                                                        | 1.60                                                                                        | 6                           | 42   | VAL     | 1.97                                                                                        | 0.78                                                                                        | 9                           |
| 11   | THR     | 1.44                                                                                        |                                                                                             | 12                          | 43   | TRP     | 1.09                                                                                        | 6.77                                                                                        | 11                          |
| 12   | LEU     | 1.24                                                                                        | 6.33                                                                                        | 12                          | 44   | THR     | 0.87                                                                                        |                                                                                             | 12                          |
| 13   | LYS     | 0.72                                                                                        | 7.05                                                                                        | 10                          | 45   | TYR     | 7.96                                                                                        | 2.25                                                                                        | 17                          |
| 15   | GLU     | 0.78                                                                                        | 1.07                                                                                        | 8                           | 46   | ASP     | 1.20                                                                                        | 7.82                                                                                        | 15                          |
| 16   | THR     | 1.03                                                                                        |                                                                                             | 12                          | 47   | ASP     | 4.06                                                                                        | 1.28                                                                                        | 15                          |
| 17   | THR     | 0.86                                                                                        |                                                                                             | 10                          | 49   | THR     | 1.33                                                                                        |                                                                                             | 11                          |
| 18   | THR     | 1.51                                                                                        |                                                                                             | 10                          | 50   | LYS     | 5.44                                                                                        | 0.88                                                                                        | 10                          |
| 19   | LYS     | 0.00                                                                                        | 0.00                                                                                        | 3                           | 51   | THR     | 0.91                                                                                        |                                                                                             | 5                           |
| 21   | VAL     | 0.64                                                                                        | 1.68                                                                                        | 15                          | 52   | PHE     | 13.38                                                                                       | 1.82                                                                                        | 15                          |
| 22   | ASP     | 6.56                                                                                        | 1.02                                                                                        | 16                          | 53   | THR     | 1.07                                                                                        |                                                                                             | 12                          |
| 24   | GLU     | 1.26                                                                                        | 1.15                                                                                        | 12                          | 54   | VAL     | 7.86                                                                                        | 1.92                                                                                        | 15                          |
| 27   | GLU     | 11.89                                                                                       | 2.04                                                                                        | 12                          | 55   | THR     | 0.58                                                                                        |                                                                                             | 6                           |
| 28   | LYS     | 0.91                                                                                        | 0.91                                                                                        | 6                           | 56   | GLU     | 0.87                                                                                        | 1.01                                                                                        | 9                           |
| 30   | PHE     | 1.42                                                                                        | 10.22                                                                                       | 18                          |      |         |                                                                                             |                                                                                             |                             |

<sup>a</sup>  $X$  values of VW-Fit results when using the backbone of the newly RDC-refined GB3 structure and the optimized entropy (the positive weight of the entropy term,  $\theta$ , was adjusted such as to increase the total RDC component of the error function (eq 1) by 2% over not using this term).

<sup>b</sup> The number of RDCs used as input for VW-Fit.

**Table S16. Observed and predicted ( $\sigma = 20^\circ$ )  $^3J_{\text{H}\alpha\text{H}\beta}$  in wild-type GB3.**

| Res# | Res-Type | proton      | $^3J_{\text{H}\alpha\text{H}\beta\_obs}$ / Hz | $^3J_{\text{H}\alpha\text{H}\beta\_pred}$ ( $\sigma = 20^\circ$ ) / Hz |              | $\Delta^3J_{\text{H}\alpha\text{H}\beta}$ (obs - pred) / Hz |              |
|------|----------|-------------|-----------------------------------------------|------------------------------------------------------------------------|--------------|-------------------------------------------------------------|--------------|
|      |          |             |                                               | 1IGD                                                                   | Rot-Analysis | 1IGD                                                        | Rot-Analysis |
| 1    | Met      | H $\beta$ 2 | 5.79                                          |                                                                        | 6.74         |                                                             | -0.95        |
| 1    | Met      | H $\beta$ 3 | 6.08                                          |                                                                        | 6.59         |                                                             | -0.51        |
| 2    | Gln      | H $\beta$ 2 | 5.37                                          |                                                                        | 5.41         |                                                             | -0.04        |
| 2    | Gln      | H $\beta$ 3 | 7.99                                          |                                                                        | 7.99         |                                                             | 0.00         |
| 3    | Tyr      | H $\beta$ 2 | 10.51                                         | 10.52                                                                  | 10.61        | -0.01                                                       | -0.09        |
| 3    | Tyr      | H $\beta$ 3 | 3.08                                          | 2.93                                                                   | 3.17         | 0.14                                                        | -0.09        |
| 4    | Lys      | H $\beta$ 2 | 6.35                                          | 4.28                                                                   | 5.91         | 2.07                                                        | 0.44         |
| 4    | Lys      | H $\beta$ 3 | 8.03                                          | 10.66                                                                  | 8.06         | -2.63                                                       | -0.03        |
| 5    | Leu      | H $\beta$ 2 | 5.29                                          | 4.50                                                                   | 4.82         | 0.79                                                        | 0.46         |
| 5    | Leu      | H $\beta$ 3 | 11.80                                         | 10.62                                                                  | 10.48        | 1.18                                                        | 1.32         |
| 6    | Val      | H $\beta$   | 9.61                                          | 9.24                                                                   | 9.53         | 0.36                                                        | 0.08         |
| 7    | Ile      | H $\beta$   | 10.06                                         | 9.23                                                                   | 9.54         | 0.83                                                        | 0.51         |
| 8    | Asn      | H $\beta$ 2 | 6.28                                          | 10.54                                                                  | 6.18         | -4.26                                                       | 0.10         |
| 8    | Asn      | H $\beta$ 3 | 7.13                                          | 2.97                                                                   | 7.36         | 4.16                                                        | -0.23        |
| 11   | Thr      | H $\beta$   | 4.98                                          | 4.54                                                                   | 3.71         | 0.44                                                        | 1.27         |
| 13   | Lys      | H $\beta$ 2 | 9.28                                          | 10.72                                                                  | 8.81         | -1.44                                                       | 0.47         |
| 13   | Lys      | H $\beta$ 3 | 4.55                                          | 3.57                                                                   | 4.60         | 0.99                                                        | -0.05        |
| 15   | Glu      | H $\beta$ 2 | 4.85                                          | 10.69                                                                  | 6.37         | -5.84                                                       | -1.52        |
| 15   | Glu      | H $\beta$ 3 | 6.01                                          | 3.37                                                                   | 5.27         | 2.64                                                        | 0.74         |
| 16   | Thr      | H $\beta$   | 2.20                                          | 2.97                                                                   | 2.95         | -0.77                                                       | -0.75        |
| 17   | Thr      | H $\beta$   | 3.94                                          | 2.34                                                                   | 2.51         | 1.59                                                        | 1.43         |
| 18   | Thr      | H $\beta$   | 3.14                                          | 2.24                                                                   | 2.50         | 0.90                                                        | 0.64         |
| 21   | Val      | H $\beta$   | 4.12                                          | 2.43                                                                   | 2.99         | 1.70                                                        | 1.13         |
| 22   | Asp      | H $\beta$ 2 | 4.21                                          | 3.25                                                                   | 3.31         | 0.95                                                        | 0.89         |
| 22   | Asp      | H $\beta$ 3 | 2.80                                          | 3.91                                                                   | 3.74         | -1.11                                                       | -0.94        |
| 24   | Glu      | H $\beta$ 2 | 6.63                                          | 7.48                                                                   | 6.98         | -0.85                                                       | -0.35        |

|             |     |     |       |       |       |             |             |
|-------------|-----|-----|-------|-------|-------|-------------|-------------|
| 24          | Glu | Hβ3 | 6.86  | 2.44  | 6.23  | 4.42        | 0.64        |
| 27          | Glu | Hβ2 | 5.33  | 3.73  | 3.76  | 1.60        | 1.57        |
| 27          | Glu | Hβ3 | 9.14  | 10.69 | 10.05 | -1.55       | -0.91       |
| 30          | Phe | Hβ2 | 10.13 | 10.05 | 10.19 | 0.07        | -0.06       |
| 30          | Phe | Hβ3 | 2.80  | 2.46  | 2.49  | 0.34        | 0.31        |
| 31          | Lys | Hβ2 | 8.35  | 10.60 | 8.90  | -2.25       | -0.56       |
| 31          | Lys | Hβ3 | 4.43  | 3.10  | 3.65  | 1.33        | 0.78        |
| 36          | Asp | Hβ2 | 9.45  | 10.11 | 10.23 | -0.65       | -0.78       |
| 36          | Asp | Hβ3 | 2.90  | 2.50  | 2.53  | 0.40        | 0.37        |
| 37          | Asn | Hβ2 | 9.56  | 10.21 | 9.87  | -0.65       | -0.31       |
| 37          | Asn | Hβ3 | 2.25  | 2.57  | 2.26  | -0.32       | -0.01       |
| 39          | Val | Hβ  | 8.95  | 9.21  | 8.85  | -0.26       | 0.10        |
| 40          | Asp | Hβ2 | 3.54  | 4.18  | 4.05  | -0.63       | -0.51       |
| 40          | Asp | Hβ3 | 8.04  | 10.67 | 8.88  | -2.63       | -0.84       |
| 42          | Val | Hβ  | 8.44  | 2.69  | 8.79  | 5.75        | -0.34       |
| 43          | Trp | Hβ2 | 9.93  | 10.51 | 10.02 | -0.58       | -0.09       |
| 43          | Trp | Hβ3 | 3.04  | 2.92  | 2.36  | 0.13        | 0.68        |
| 44          | Thr | Hβ  | 3.25  | 2.04  | 2.40  | 1.21        | 0.85        |
| 45          | Tyr | Hβ2 | 6.26  | 4.76  | 4.24  | 1.50        | 2.02        |
| 45          | Tyr | Hβ3 | 11.59 | 10.54 | 10.62 | 1.05        | 0.97        |
| 46          | Asp | Hβ2 | 3.96  | 3.68  | 3.89  | 0.28        | 0.07        |
| 46          | Asp | Hβ3 | 9.84  | 10.68 | 10.65 | -0.84       | -0.81       |
| 47          | Asp | Hβ2 | 4.29  | 2.56  | 3.97  | 1.73        | 0.33        |
| 47          | Asp | Hβ3 | 10.17 | 10.05 | 9.04  | 0.13        | 1.13        |
| 51          | Thr | Hβ  | 9.16  | 8.34  | 8.38  | 0.82        | 0.78        |
| 53          | Thr | Hβ  | 8.00  | 8.44  | 8.48  | -0.44       | -0.48       |
| 54          | Val | Hβ  | 4.20  | 3.53  | 4.67  | 0.67        | -0.47       |
| 55          | Thr | Hβ  | 8.17  | 3.43  | 8.58  | 4.73        | -0.41       |
| <b>RMSD</b> |     |     |       |       |       | <b>2.05</b> | <b>0.75</b> |

## References

1. Ruckert, M.; Otting, G., *J. Am. Chem. Soc.* **2000**, 122, 7793-7797.
  2. Fitzkee, N. C.; Bax, A., *J. Biomol. NMR* **2010**, 48, 65-70.
  3. Lohr, F.; Schmidt, J. M.; Ruterjans, H., *J. Am. Chem. Soc.* **1999**, 121, 11821-11826.
  4. Yamazaki, T.; Lee, W.; Arrowsmith, C. H.; Muhandiram, D. R.; Kay, L. E., *J. Am. Chem. Soc.* **1994**, 116, 11655-11666.
  5. Silver, M. S.; Joseph, R. I.; Hoult, D. I., *Nature* **1984**, 310, 681-683.
  6. Geen, H.; Freeman, R., *J. Magn. Reson.* **1991**, 93, 93-141.
  7. Shaka, A. J.; Keler, J.; Freeman, R., *J. Mag. Res.*, **1983**, 53, 313-340.
  8. Hall, J. B.; Fushman, D., *J. Biomol. NMR* **2003**, 27, 261-275.
  9. Yao, L.; Vogeli, B.; Torchia, D. A.; Bax, A., *J. Phys. Chem. B* **2008**, 112, 6045-6056.
-
